# Supplementary material
Source: PubMed Central journal article supplement (PMC6898787)
Supplement: NIHMS1541330-supplement-1.pdf [file NIHMS1541330-supplement-1.pdf]

# Supplementary Figure 1

## Figure 2c

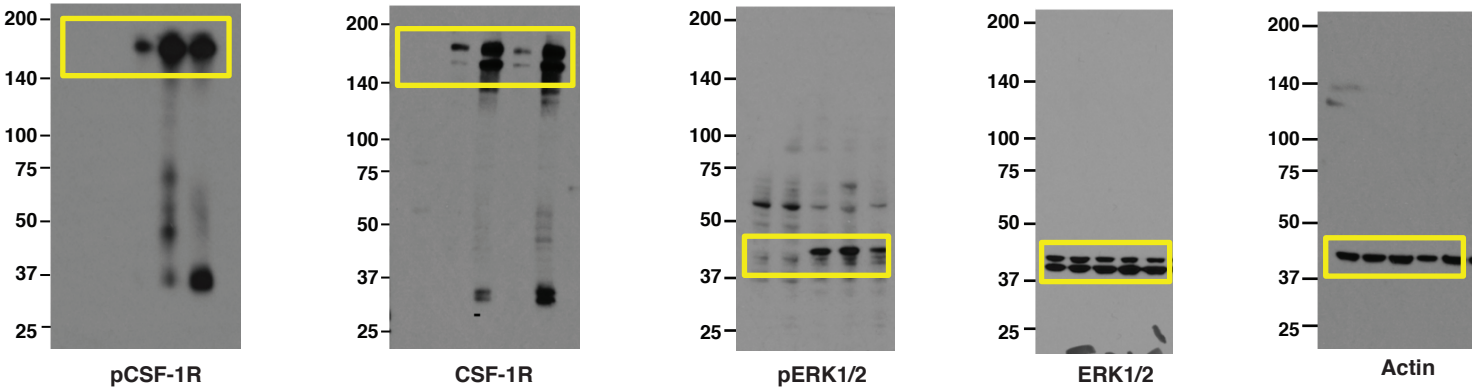

# Supplementary Figure 2

## Extended Data Figure 10f

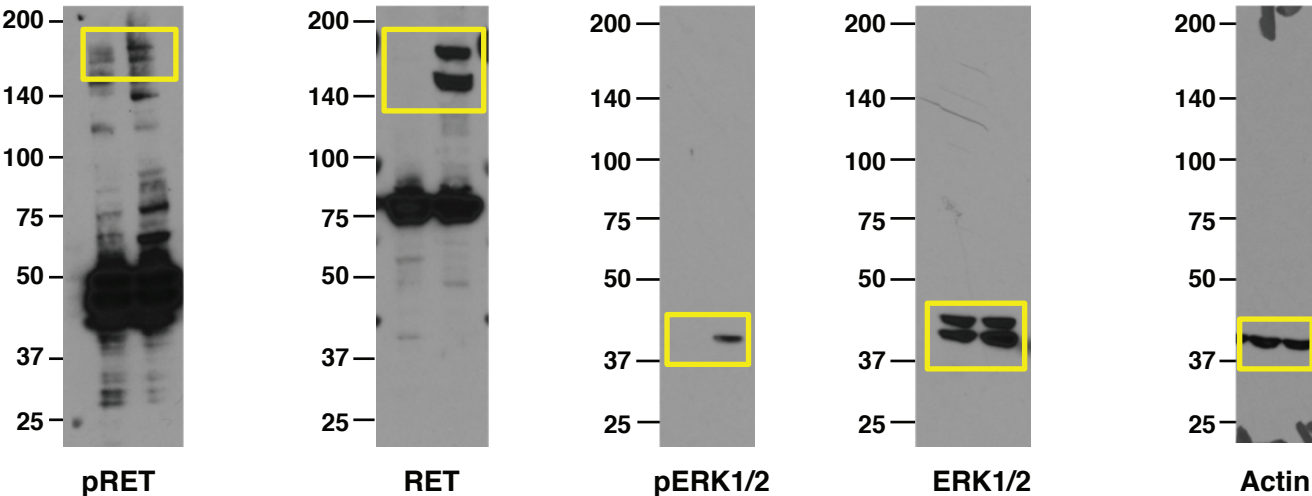

**Supplementary Table 1: Clinical features of histiocytoses patients in the current study.**

| Study ID | Age (years) | Sex    | Histiocytosis Subtype   | Tissue Site                                                 |
|----------|-------------|--------|-------------------------|-------------------------------------------------------------|
| ECD-1    | 75          | Male   | Erdheim-Chester Disease | Bone                                                        |
| ECD-2    | 76          | Female | Erdheim-Chester Disease | Skin                                                        |
| ECD-3    | 65          | Female | Erdheim-Chester Disease | Bone; Pituitary; Retroperitoneum                            |
| ECD-4    | 50          | Female | Erdheim-Chester Disease | Cerebellum                                                  |
| ECD-5    | 70          | Male   | Erdheim-Chester Disease | Bone; Oral Mucosa                                           |
| ECD-6    | 65          | Female | Erdheim-Chester Disease | Femur; Mastoid                                              |
| ECD-7    | 37          | Male   | Erdheim-Chester Disease | Dura; Testicle; Bone; Skin                                  |
| ECD-8    | 59          | Male   | Erdheim-Chester Disease | Bone; Skin                                                  |
| ECD-9    | 47          | Female | Erdheim-Chester Disease | Bone                                                        |
| ECD-10   | 47          | Female | Erdheim-Chester Disease | Bone                                                        |
| ECD-11   | 36          | Female | Erdheim-Chester Disease | Bone; Lung                                                  |
| ECD-12   | 47          | Male   | Erdheim-Chester Disease | Bone; Retroperitoneum                                       |
| ECD-13   | 48          | Female | Erdheim-Chester Disease | Brain; Bone; Retroperitoneum                                |
| ECD-14   | 73          | Male   | Erdheim-Chester Disease | Bone; Retroperitoneum                                       |
| ECD-15   | 74          | Male   | Erdheim-Chester Disease | Brain; Bone; Lung; Retroperitoneum                          |
| ECD-16   | 65          | Female | Erdheim-Chester Disease | Bone; Lung; Retroperitoneum                                 |
| ECD-17   | 52          | Female | Erdheim-Chester Disease | Bone; Pituitary; Skin; Soft Tissue                          |
| ECD-18   | 51          | Female | Erdheim-Chester Disease | Bone; Skin; Soft Tissue                                     |
| ECD-19   | 67          | Male   | Erdheim-Chester Disease | Bone; Lung; Pleura; Skin; Soft Tissue                       |
| ECD-20   | 65          | Male   | Erdheim-Chester Disease | Bone; Skin; Soft Tissue                                     |
| ECD-21   | 55          | Female | Erdheim-Chester Disease | Bone; Retroperitoneum; Soft Tissue                          |
| ECD-22   | 52          | Female | Erdheim-Chester Disease | Bone; Maxilla; Skin; Soft Tissue                            |
| ECD-23   | 73          | Male   | Erdheim-Chester Disease | Bone; Brain; Retroperitoneum                                |
| ECD-24   | 55          | Male   | Erdheim-Chester Disease | Bone; Brain; Retroperitoneum                                |
| ECD-25   | 47          | Female | Erdheim-Chester Disease | Bone; Orbit; Retroperitoneum                                |
| ECD-26   | 51          | Male   | Erdheim-Chester Disease | Bone; Epidural Soft Tissue; Orbit                           |
| ECD-27   | 66          | Female | Erdheim-Chester Disease | Bone; Brain; Retroperitoneum; Skin                          |
| ECD-28   | 64          | Female | Erdheim-Chester Disease | Bone                                                        |
| ECD-29   | 50          | Male   | Erdheim-Chester Disease | Bone; Brain; Retroperitoneum; Heart                         |
| ECD-30   | 58          | Male   | Erdheim-Chester Disease | Bone; Orbit; Retroperitoneum                                |
| ECD-31   | 75          | Male   | Erdheim-Chester Disease | Bone; Orbit; Retroperitoneum                                |
| ECD-32   | 59          | Male   | Erdheim-Chester Disease | Bone; Orbit; Retroperitoneum                                |
| ECD-33   | 35          | Male   | Erdheim-Chester Disease | Bone; Brain; Cavernous Sinus; Skull; Heart; Retroperitoneum |
| ECD-34   | 41          | Male   | Erdheim-Chester Disease | Orbit                                                       |
| ECD-35   | 45          | Female | Erdheim-Chester Disease | Bone                                                        |
| ECD-36   | 47          | Male   | Erdheim-Chester Disease | Brain; Orbit; Heart; Bone                                   |
| ECD-37   | 58          | Female | Erdheim-Chester Disease | Skin; Bone; Brain                                           |
| ECD-38   | 53          | Male   | Erdheim-Chester Disease | Retroperitoneum                                             |
| ECD-39   | 65          | Female | Erdheim-Chester Disease | Dura; Temporalis Muscle; Bone; Brain                        |
| ECD-40   | 56          | Female | Erdheim-Chester Disease | Cerebellum                                                  |
| ECD-41   | 64          | Female | Erdheim-Chester Disease | Bone; Lung; Pleura                                          |
| ECD-42   | 67          | Female | Erdheim-Chester Disease | Skin                                                        |
| ECD-43   | 43          | Female | Erdheim-Chester Disease | Bone                                                        |
| ECD-44   | 56          | Male   | Erdheim-Chester Disease | Skin; Bone                                                  |
| ECD-45   | 45          | Male   | Erdheim-Chester Disease | Bone; Skin                                                  |
| ECD-46   | 7           | Male   | Erdheim-Chester Disease | Bone; Orbit; Sinonasal                                      |
| ECD-47   | 53          | Male   | Erdheim-Chester Disease | Kidney                                                      |
| ECD-48   | 58          | Male   | Erdheim-Chester Disease | Perirenal; Tibia                                            |
| ECD-49   | 48          | Male   | Erdheim-Chester Disease | Bone; Skin                                                  |
| ECD-50   | 37          | Male   | Erdheim-Chester Disease | Testicle; Bone; Peritoneum; Retroperitoneum; Omentum        |
| ECD-51   | 30          | Male   | Erdheim-Chester Disease | Epidural; Tibia                                             |

|         |    |        |                               |                                     |
|---------|----|--------|-------------------------------|-------------------------------------|
| ECD-52  | 67 | Male   | Erdheim-Chester Disease       | Testicle; Prostate; Bone            |
| ECD-53  | 60 | Male   | Erdheim-Chester Disease       | Retroperitoneum; Femur              |
| ECD-54  | 51 | Male   | Erdheim-Chester Disease       | Perirenal; Tibia                    |
| ECD-55  | 60 | Female | Erdheim-Chester Disease       | Bone (WES)                          |
| ECD-56  | 31 | Female | Erdheim-Chester Disease       | Dura                                |
| ECD-57  | 56 | Female | Erdheim-Chester Disease       | Bone; Soft Tissue; Skin             |
| ECD-58  | 45 | Male   | Erdheim-Chester Disease       | Soft Tissue                         |
| ECD-59  | 82 | Female | Erdheim-Chester Disease       | Skin                                |
| ECD-60  | 55 | Male   | Erdheim-Chester Disease       | Skin                                |
| ECD-61  | 71 | Male   | Erdheim-Chester Disease       | Retroperitoneum                     |
| ECD-62  | 54 | Male   | Erdheim-Chester Disease       | Mesentery                           |
| ECD-63  | 52 | Male   | Erdheim-Chester Disease       | Mesentery                           |
| ECD-64  | 47 | Male   | Erdheim-Chester Disease       | Skin                                |
| ECD-65  | 71 | Male   | Erdheim-Chester Disease       | Skin                                |
| ECD-66  | 55 | Male   | Erdheim-Chester Disease       | Heart                               |
| ECD-67  | 53 | Male   | Erdheim-Chester Disease       | Pleura; Lung                        |
| ECD-68  | 66 | Female | Erdheim-Chester Disease       | Heart; Mediastinum; Bone            |
| ECD-69  | 46 | Female | Erdheim-Chester Disease       | Soft Tissue                         |
| ECD-70  | 33 | Male   | Erdheim-Chester Disease       | Skin; Larynx                        |
| ECD-71  | 54 | Male   | Erdheim-Chester Disease       | Skin; Bone                          |
| ECD-72  | 64 | Female | Erdheim-Chester Disease       | Lymph Node; Mesentery               |
| ECD-73  | 42 | Male   | Erdheim-Chester Disease       | Brain; Lung; Soft Tissue; Bone      |
| ECD-74  | 66 | Male   | Erdheim-Chester Disease       | Dura; Soft Tissue; Bone             |
| ECD-75  | 64 | Male   | Erdheim-Chester Disease       | Pleura                              |
| ECD-76  | 65 | Male   | Erdheim-Chester Disease       | Pleura                              |
| ECD-77  | 73 | Male   | Erdheim-Chester Disease       | Peritoneum (N)                      |
| ECD-78  | 58 | Male   | Erdheim-Chester Disease       | Skin; Lung (A)                      |
| ECD-79  | 59 | Female | Erdheim-Chester Disease       | Skull; Femur; Skin                  |
| ECD-80  | 55 | Female | Erdheim-Chester Disease       | Skin; Bone                          |
| ECD-81  | 65 | Female | Erdheim-Chester Disease       | Bone; Skin                          |
| ECD-82  | 37 | Male   | Erdheim-Chester Disease       | Bone                                |
| ECD-83  | 33 | Male   | Erdheim-Chester Disease       | Bone                                |
| ECD-84  | 31 | Male   | Erdheim-Chester Disease       | Tibia                               |
| ECD-85  | 66 | Male   | Erdheim-Chester Disease       | Perirenal; Soft Tissue; Bone        |
| ECD-86  | 52 | Male   | Erdheim-Chester Disease       | Pericardium; Retroperitoneum        |
| ECD-87  | 45 | Female | Erdheim-Chester Disease       | Skin                                |
| ECD-88  | 34 | Female | Erdheim-Chester Disease       | Hypothalamus                        |
| ECD-89  | 43 | Female | Erdheim-Chester Disease       | Bone; Lymph Node                    |
| ECD-90  | 25 | Female | Erdheim-Chester Disease       | Skin                                |
| ECD-91  | 42 | Female | Erdheim-Chester Disease       | Polyradiculopathy; Skin; Lymph Node |
| ECD-92  | 50 | Male   | Erdheim-Chester Disease       | Liver                               |
| ECD-93  | 50 | Female | Erdheim-Chester Disease       | Lung; Stomach; Colon; Bone          |
| ECD-94  | 47 | Male   | Erdheim-Chester Disease       | Perinephric Soft Tissue             |
| ECD-95  | 27 | Male   | Erdheim-Chester Disease       | Skin; Ankle                         |
| ECD-96  | 49 | Male   | Erdheim-Chester Disease       | Soft Tissue of Shoulder; Bone       |
| ECD-97  | 31 | Male   | Erdheim-Chester Disease       | Paravertebral                       |
| ECD-98  | 58 | Male   | Erdheim-Chester Disease       | Perirenal                           |
| ECD-99  | 82 | Female | Erdheim-Chester Disease       | Skin                                |
| ECD-100 | 48 | Female | Erdheim-Chester Disease       | Soft Tissue                         |
| LCH-1   | 1  | Male   | Langerhans Cell Histiocytosis | Left Maxillary Sinus                |
| LCH-2   | 1  | Male   | Langerhans Cell Histiocytosis | Epidural Space                      |
| LCH-3   | 9  | Male   | Langerhans Cell Histiocytosis | Scapula                             |
| LCH-4   | 10 | Male   | Langerhans Cell Histiocytosis | Brain                               |
| LCH-5   | 78 | Female | Langerhans Cell Histiocytosis | Skin                                |
| LCH-6   | 72 | Female | Langerhans Cell Histiocytosis | Skin                                |
| LCH-7   | 37 | Female | Langerhans Cell Histiocytosis | Bone                                |
| LCH-8   | 34 | Male   | Langerhans Cell Histiocytosis | Bone                                |
| LCH-9   | 45 | Female | Langerhans Cell Histiocytosis | Bone; Skin                          |

|        |       |        |                               |                                 |
|--------|-------|--------|-------------------------------|---------------------------------|
| LCH-10 | 32    | Male   | Langerhans Cell Histiocytosis | Bone; Skin; Soft Tissue         |
| LCH-11 | 18    | Female | Langerhans Cell Histiocytosis | Bone; Soft Tissue               |
| LCH-12 | 39    | Male   | Langerhans Cell Histiocytosis | Bone                            |
| LCH-13 | 33    | Male   | Langerhans Cell Histiocytosis | Skin                            |
| LCH-14 | 70    | Male   | Langerhans Cell Histiocytosis | Lung; Spleen                    |
| LCH-15 | 4 mo. | Female | Langerhans Cell Histiocytosis | Bone; Liver; Spleen             |
| LCH-16 | 2     | Male   | Langerhans Cell Histiocytosis | Bone; Intestine; Liver; Skin    |
| LCH-17 | 2     | Female | Langerhans Cell Histiocytosis | Bone; Pituitary; Skin           |
| LCH-18 | 13    | Male   | Langerhans Cell Histiocytosis | Bone (Frontal); CNS Risk        |
| LCH-19 | 4     | Female | Langerhans Cell Histiocytosis | Bone (Maxilla); CNS Risk        |
| LCH-20 | 7     | Female | Langerhans Cell Histiocytosis | Bone (Frontal); CNS Risk        |
| LCH-21 | 3     | Male   | Langerhans Cell Histiocytosis | Bone                            |
| LCH-22 | 12    | Male   | Langerhans Cell Histiocytosis | Bone (Frontal); CNS Risk        |
| LCH-23 | 2     | Male   | Langerhans Cell Histiocytosis | Bone (Frontal); CNS Risk        |
| LCH-24 | 3     | Male   | Langerhans Cell Histiocytosis | Bone; Pituitary; Skin           |
| LCH-25 | 10    | Male   | Langerhans Cell Histiocytosis | Bone (Parietal); CNS Risk; Skin |
| LCH-26 | 9     | Male   | Langerhans Cell Histiocytosis | Bone; Pituitary                 |
| LCH-27 | 1     | Female | Langerhans Cell Histiocytosis | Bone (Iliac)                    |
| LCH-28 | 7     | Female | Langerhans Cell Histiocytosis | Bone; Mastoid                   |
| LCH-29 | 14    | Female | Langerhans Cell Histiocytosis | Femur                           |
| LCH-30 | 4     | Male   | Langerhans Cell Histiocytosis | Bone; Palate; Pituitary         |
| LCH-31 | 13    | Male   | Langerhans Cell Histiocytosis | Bone (Frontal); CNS Risk        |
| LCH-32 | 10    | Male   | Langerhans Cell Histiocytosis | Humerus                         |
| LCH-33 | 2     | Male   | Langerhans Cell Histiocytosis | Skull                           |
| LCH-34 | 4     | Male   | Langerhans Cell Histiocytosis | Mandible                        |
| LCH-35 | 2     | Male   | Langerhans Cell Histiocytosis | Lymph Node; Skin                |
| LCH-36 | 3     | Female | Langerhans Cell Histiocytosis | Skin                            |
| LCH-37 | 5     | Male   | Langerhans Cell Histiocytosis | Bone                            |
| LCH-38 | 12    | Female | Langerhans Cell Histiocytosis | Bone; Skin                      |
| LCH-39 | 15    | Male   | Langerhans Cell Histiocytosis | Bone; Skin                      |
| LCH-40 | 71    | Female | Langerhans Cell Histiocytosis | Skin                            |
| LCH-41 | 25    | Female | Langerhans Cell Histiocytosis | Bone                            |
| LCH-42 | 35    | Female | Langerhans Cell Histiocytosis | Bone                            |
| LCH-43 | 19    | Male   | Langerhans Cell Histiocytosis | Bone; Brain; Pituitary          |
| LCH-44 | 9     | Female | Langerhans Cell Histiocytosis | Bone                            |
| LCH-45 | 9     | Female | Langerhans Cell Histiocytosis | Bone                            |
| LCH-46 | 2     | Female | Langerhans Cell Histiocytosis | Bone; Brain; Pituitary          |
| LCH-47 | 5 mo. | Male   | Langerhans Cell Histiocytosis | Bone; Brain; Pituitary; Skin    |
| LCH-48 | 8     | Female | Langerhans Cell Histiocytosis | Bone                            |
| LCH-49 | 53    | Female | Langerhans Cell Histiocytosis | Bone; Brain; Liver; Lung; Skin  |
| LCH-50 | 58    | Female | Langerhans Cell Histiocytosis | Lung                            |
| LCH-51 | 31    | Male   | Langerhans Cell Histiocytosis | Bone                            |
| LCH-52 | 54    | Female | Langerhans Cell Histiocytosis | Bone; Spleen                    |
| LCH-53 | 33    | Male   | Langerhans Cell Histiocytosis | Skin                            |
| LCH-54 | 2     | Male   | Langerhans Cell Histiocytosis | Femur                           |
| LCH-55 | 8     | Female | Langerhans Cell Histiocytosis | Tibia                           |
| LCH-56 | 4     | Female | Langerhans Cell Histiocytosis | Skin (Forehead)                 |
| LCH-57 | 2     | Male   | Langerhans Cell Histiocytosis | Skull                           |
| LCH-58 | 8     | Male   | Langerhans Cell Histiocytosis | Bone                            |
| LCH-59 | 1     | Female | Langerhans Cell Histiocytosis | Bone                            |
| LCH-60 | 1     | Male   | Langerhans Cell Histiocytosis | Lymph Node                      |
| LCH-61 | 17    | Male   | Langerhans Cell Histiocytosis | Bone                            |
| LCH-62 | 13    | Male   | Langerhans Cell Histiocytosis | Skin                            |
| LCH-63 | 2     | Male   | Langerhans Cell Histiocytosis | Bone                            |
| LCH-64 | 2     | Female | Langerhans Cell Histiocytosis | Bone; Lung                      |
| LCH-65 | 24    | Female | Langerhans Cell Histiocytosis | Oral Mucosa                     |
| LCH-66 | 53    | Female | Langerhans Cell Histiocytosis | Lung                            |
| LCH-67 | 33    | Male   | Langerhans Cell Histiocytosis | Lymph Node; Skin; Oral Mucosa   |
| LCH-68 | 39    | Male   | Langerhans Cell Histiocytosis | Bone; Dura                      |

|              |          |        |                               |                                     |
|--------------|----------|--------|-------------------------------|-------------------------------------|
| LCH-69       | 33       | Male   | Langerhans Cell Histiocytosis | Skin                                |
| LCH-70       | 24       | Female | Langerhans Cell Histiocytosis | Skull                               |
| LCH-71       | 55       | Male   | Langerhans Cell Histiocytosis | Skin; Colon                         |
| LCH-72       | 4        | Male   | Langerhans Cell Histiocytosis | Femur                               |
| LCH-73       | 37       | Female | Langerhans Cell Histiocytosis | Thyroid; Lymph Node; Salivary Gland |
| LCH-74       | 57       | Male   | Langerhans Cell Histiocytosis | Lymph Node; Oral Mucosa             |
| LCH-75       | 29       | Female | Langerhans Cell Histiocytosis | Skin                                |
| LCH-76       | 7        | Male   | Langerhans Cell Histiocytosis | Skull; Dura; Skin                   |
| LCH-77       | 17       | Male   | Langerhans Cell Histiocytosis | Skin                                |
| LCH-78       | 3        | Male   | Langerhans Cell Histiocytosis | Skull                               |
| LCH-79       | 11       | Female | Langerhans Cell Histiocytosis | Bone; CNS Risk Frontal              |
| LCH-80       | 14       | Male   | Langerhans Cell Histiocytosis | Bone; Lymph Nodes                   |
| LCH-81       | 6        | Female | Langerhans Cell Histiocytosis | Skin                                |
| LCH-82       | 32       | Male   | Langerhans Cell Histiocytosis | Lymph Node; Skin; Soft Tissue       |
| LCH-83       | 26       | Male   | Langerhans Cell Histiocytosis | Dura                                |
| LCH-84       | 1        | Male   | Langerhans Cell Histiocytosis | Humerus                             |
| LCH-85       | 8        | Male   | Langerhans Cell Histiocytosis | Mandible; CNS Risk                  |
| LCH-86       | 3        | Male   | Langerhans Cell Histiocytosis | Scapula                             |
| LCH-87       | 10       | Male   | Langerhans Cell Histiocytosis | Bone (Iliac Crest)                  |
| LCH-88       | 7        | Female | Langerhans Cell Histiocytosis | Lymph Node; Vertebra                |
| LCH-89       | 7        | Female | Langerhans Cell Histiocytosis | Skin                                |
| LCH-90       | 55       | Female | Langerhans Cell Histiocytosis | Bone Marrow; Muscle; Hypothalamus   |
| LCH-91       | 56       | Female | Langerhans Cell Histiocytosis | Lung                                |
| LCH-92       | 60       | Male   | Langerhans Cell Histiocytosis | Skin                                |
| <b>JXG-1</b> |          |        |                               |                                     |
| JXG-1        | 46       | Male   | Juvenile Xanthogranuloma      | Soft Tissue                         |
| JXG-2        | 50       | Female | Juvenile Xanthogranuloma      | Breast Soft Tissue; Lacrimal Gland  |
| JXG-3        | 63       | Female | Juvenile Xanthogranuloma      | Skin                                |
| JXG-4        | 29       | Male   | Juvenile Xanthogranuloma      | Skin                                |
| JXG-5        | 16       | Male   | Juvenile Xanthogranuloma      | Skin (Genitourinary)                |
| JXG-6        | 2        | Male   | Juvenile Xanthogranuloma      | Skin                                |
| JXG-7        | 4.5 mo.  | Male   | Juvenile Xanthogranuloma      | Skin (Genitourinary)                |
| JXG-8        | 5 mo.    | Male   | Juvenile Xanthogranuloma      | Skin (Lower Extremity)              |
| JXG-9        | 13.5 mo. | Female | Juvenile Xanthogranuloma      | Skin (Head)                         |
| JXG-10       | 1        | Female | Juvenile Xanthogranuloma      | Skin; Eye                           |
| JXG-11       | 1        | Female | Juvenile Xanthogranuloma      | Skin                                |
| JXG-12       | 21.5 mo. | Female | Juvenile Xanthogranuloma      | Skin (Genitourinary)                |
| JXG-13       | 15.5 mo. | Female | Juvenile Xanthogranuloma      | Skin (Head)                         |
| JXG-14       | 30       | Female | Juvenile Xanthogranuloma      | Skin                                |
| JXG-15       | 23       | Male   | Juvenile Xanthogranuloma      | Skin                                |
| JXG-16       | 17       | Female | Juvenile Xanthogranuloma      | Skin                                |
| JXG-17       | 9        | Male   | Juvenile Xanthogranuloma      | Skin (Head)                         |
| JXG-18       | 35       | Male   | Juvenile Xanthogranuloma      | Skin                                |
| JXG-19       | 22       | Female | Juvenile Xanthogranuloma      | Skin                                |
| JXG-20       | 30       | Male   | Juvenile Xanthogranuloma      | Skin                                |
| JXG-21       | 4        | Female | Juvenile Xanthogranuloma      | Skin (Lower Extremity)              |
| JXG-22       | 3        | Female | Juvenile Xanthogranuloma      | Skin (Head)                         |
| JXG-23       | 2.5 mo.  | Male   | Juvenile Xanthogranuloma      | Skin (Head)                         |
| JXG-24       | 3        | Female | Juvenile Xanthogranuloma      | Skin (Head)                         |
| JXG-25       | 6.5 mo.  | Male   | Juvenile Xanthogranuloma      | Skin (Trunk)                        |
| JXG-26       | 3        | Male   | Juvenile Xanthogranuloma      | Skin (Lower Extremity)              |
| JXG-27       | 17       | Male   | Juvenile Xanthogranuloma      | Skin (Trunk)                        |
| JXG-28       | 12.5 mo. | Female | Juvenile Xanthogranuloma      | Skin (Head)                         |
| JXG-29       | 2.5 mo.  | Male   | Juvenile Xanthogranuloma      | Skin (Head)                         |
| JXG-30       | 3        | Male   | Juvenile Xanthogranuloma      | Skin (Head)                         |
| JXG-31       | 11 mo.   | Male   | Juvenile Xanthogranuloma      | Skin (Head)                         |
| JXG-32       | 4        | Male   | Juvenile Xanthogranuloma      | Skin (Trunk)                        |
| JXG-33       | 10       | Male   | Juvenile Xanthogranuloma      | Skin (Head)                         |
| JXG-34       | 4 mo.    | Male   | Juvenile Xanthogranuloma      | Skin (Head)                         |

|          |          |        |                          |                                  |
|----------|----------|--------|--------------------------|----------------------------------|
| JXG-35   | 14       | Male   | Juvenile Xanthogranuloma | Brain                            |
| JXG-36   | 12       | Female | Juvenile Xanthogranuloma | Skin; Bone; Lymph Node; Lung     |
| JXG-37   | 15       | Male   | Juvenile Xanthogranuloma | Skin                             |
| JXG-38   | 29       | Male   | Juvenile Xanthogranuloma | Brain; Vertebra                  |
| JXG-39   | 36       | Male   | Juvenile Xanthogranuloma | Skin (Disseminated)              |
| JXG-40   | 4        | Female | Juvenile Xanthogranuloma | Skin (Chest)                     |
| JXG-41   | 21 mo.   | Female | Juvenile Xanthogranuloma | Skin (Head)                      |
| JXG-42   | 20 mo.   | Female | Juvenile Xanthogranuloma | Skin (Extremity)                 |
| JXG-43   | 9 mo.    | Male   | Juvenile Xanthogranuloma | Skin (Head)                      |
| JXG-44   | 12       | Male   | Juvenile Xanthogranuloma | Skin (Head)                      |
| JXG-45   | 29.5 mo. | Male   | Juvenile Xanthogranuloma | Skin (Upper Extremity)           |
| JXG-46   | 30.5 mo. | Female | Juvenile Xanthogranuloma | Skin (Head)                      |
| JXG-47   | 25 mo.   | Male   | Juvenile Xanthogranuloma | Skin (Upper Extremity)           |
| JXG-48   | 8        | Male   | Juvenile Xanthogranuloma | Skin                             |
| JXG-49   | 3        | Male   | Juvenile Xanthogranuloma | Skin                             |
| JXG-50   | 27       | Female | Juvenile Xanthogranuloma | Skin                             |
| JXG-51   | 39       | Female | Juvenile Xanthogranuloma | Skin                             |
| JXG-52   | 5        | Male   | Juvenile Xanthogranuloma | Skin                             |
| JXG-53   | 11       | Male   | Juvenile Xanthogranuloma | Skin (Genitourinary)             |
| JXG-54   | 7        | Female | Juvenile Xanthogranuloma | Skin (Upper Extremity)           |
| JXG-55   | 4        | Male   | Juvenile Xanthogranuloma | Skin (Head)                      |
| <b> </b> |          |        |                          |                                  |
| RDD-1    | 25       | Female | Rosai-Dorfman Disease    | Lymph Node                       |
| RDD-2    | 27       | Male   | Rosai-Dorfman Disease    | Lymph Node                       |
| RDD-3    | 35       | Female | Rosai-Dorfman Disease    | Soft Tissue                      |
| RDD-4    | 59       | Female | Rosai-Dorfman Disease    | Brain; Breast Soft Tissue        |
| RDD-5    | 43       | Male   | Rosai-Dorfman Disease    | Soft Tissue                      |
| RDD-6    | 60       | Male   | Rosai-Dorfman Disease    | Brain; Spinal Cord               |
| RDD-7    | 19       | Female | Rosai-Dorfman Disease    | Lymph Node                       |
| RDD-8    | 49       | Female | Rosai-Dorfman Disease    | Pituitary Stalk                  |
| RDD-9    | 52       | Female | Rosai-Dorfman Disease    | Sinuses                          |
| RDD-10   | 30       | Male   | Rosai-Dorfman Disease    | Brain; Cornea                    |
| RDD-11   | 6        | Male   | Rosai-Dorfman Disease    | Cheek                            |
| RDD-12   | 30       | Female | Rosai-Dorfman Disease    | Meninges                         |
| RDD-13   | 62       | Male   | Rosai-Dorfman Disease    | Axillary Soft Tissue             |
| RDD-14   | 3        | Female | Rosai-Dorfman Disease    | Lymph Node                       |
| RDD-15   | 4        | Female | Rosai-Dorfman Disease    | Lymph Node                       |
| RDD-16   | 25       | Female | Rosai-Dorfman Disease    | Tibia                            |
| RDD-17   | 58       | Female | Rosai-Dorfman Disease    | Brain                            |
| <b> </b> |          |        |                          |                                  |
| HS-1     | 76       | Male   | Histiocytic Sarcoma      | Soft Tissue; Lung; Brain         |
| HS-2     | 61       | Male   | Histiocytic Sarcoma      | Lymph Node                       |
| HS-3     | 60       | Female | Histiocytic Sarcoma      | Lymph Node                       |
| HS-4     | 25       | Male   | Histiocytic Sarcoma      | Soft Tissue                      |
| HS-5     | 31       | Male   | Histiocytic Sarcoma      | Left Cervical Bone (Bone Marrow) |
| HS-6     | 38       | Female | Histiocytic Sarcoma      | Retroperitoneum                  |

**Abbreviations:** Erdheim-Chester Disease (ECD); Langerhans Cell Histiocytosis (LCH); Juvenile Xanthogranuloma (JXG); Rosai-Dorfman Disease (RDD); Histiocytic Sarcoma (HS); months (mo).

Supplementary Table 2: Somatic mutations and fusions in Erdheim-Chester Disease Cohort.

| Study ID | Gene           | Genomic Coordinates | Genomic Variant   | Amino Acid Change | VAF |
|----------|----------------|---------------------|-------------------|-------------------|-----|
| ECD-1    | <i>BRAF</i>    | chr7:140453136      | c.1799A>T         | p.V600E           | 15% |
| ECD-2    | <i>BRAF</i>    | chr7:140453136      | c.1799A>T         | p.V600E           | 9%  |
|          | <i>EP400</i>   | chr12:132547093     | c.8181_8182insCAG | p.Q2727delinsQQ   | 15% |
|          | <i>KMT2C</i>   | chr7:151962265      | c.G1042G>A        | p.D348N           | 4%  |
|          | <i>ATXN1</i>   | chr6:16327948       | c.593_594insGCA   | p.Q198delinsQQ    | 24% |
|          | <i>HMGXB4</i>  | chr22:35661543      | c.1163insA        | p.E388fs          | 10% |
| ECD-3    | <i>BRAF</i>    | chr7:140453136      | c.1799A>T         | p.V600E           | 12% |
|          | <i>FIP1L1</i>  | chr4:54319248       | c.1447_1448del    | p.R483fs          | 11% |
|          | <i>TOX3</i>    | chr16:52502453      | c.109G>A          | p.E37K            | 15% |
| ECD-4    | <i>BRAF</i>    | chr7:140453136      | c.1799A>T         | p.V600E           | 19% |
|          | <i>MED15</i>   | chr22:20918916      | c.631_633del      | p.Q211del         | 10% |
|          | <i>INO80E</i>  | chr16:30016629      | c.602dupC         | p.T201fs          | 12% |
|          | <i>SETD8</i>   | chr12:123889486     | c.713G>C          | p.R238P           | 9%  |
|          | <i>SETD8</i>   | chr12:123889492     | c.A719C           | p.D240A           | 8%  |
|          | <i>USP8</i>    | chr15:50784990      | c.2327T>C         | p.L776P           | 5%  |
|          | <i>CSPG4</i>   | chr15:75982085      | c.1321G>A         | p.E441K           | 10% |
| ECD-5    | <i>BRAF</i>    | chr7:140453136      | c.1799A>T         | p.V600E           | 8%  |
|          | <i>FGFR1</i>   | chr8:38285914       | c.396_398delITGA  | p.D133delID       | 12% |
|          | <i>SMARCD3</i> | chr7:150972220      | c.19C>T           | p.H7Y             | 9%  |
|          | <i>BTAF1</i>   | chr10:93699809      | c.239C>T          | p.P80L            | 7%  |
| ECD-6    | <i>BRAF</i>    | chr7:140453136      | c.1799A>T         | p.V600E           | 2%  |
| ECD-7    | <i>BRAF</i>    | chr7:140453136      | c.1799A>T         | p.V600E           | 3%  |
| ECD-8    | <i>BRAF</i>    | chr7:140453136      | c.1799A>T         | p.V600E           | 8%  |
|          | <i>AMER1</i>   | chrX:63410516       | c.2651C>T         | p.P884L           | 12% |
| ECD-9    | <i>BRAF</i>    | chr7:140453136      | c.1799A>T         | p.V600E           | 7%  |
|          | <i>MAP3K19</i> | chr2:135756487      | c.395G>T          | p.R132M           | 6%  |
|          | <i>JAK2</i>    | chr9:5069154        | c.1459C>A         | p.R487S           | 5%  |
|          | <i>TAB3</i>    | chrX:30872481       | c.1301C>A         | p.P434Q           | 4%  |
|          | <i>TAB3</i>    | chrX:30873066       | c.716C>A          | p.S239X           | 5%  |
|          | <i>FGF5</i>    | chr4:81196141       | c.434C>A          | p.S145X           | 6%  |
|          | <i>FAT1</i>    | chr4:187557879      | c.3832G>T         | p.D1278Y          | 4%  |
|          | <i>CSNK1G1</i> | chr15:64508874      | c.331G>T          | p.G111W           | 19% |
|          | <i>DDX43</i>   | chr6:74104738       | c.110G>T          | p.R37L            | 8%  |
|          | <i>NCOA1</i>   | chr2:24933824       | c.2443G>T         | p.D815Y           | 8%  |
|          | <i>WDR33</i>   | chr2:128471212      | c.3253G>T         | p.E1085X          | 8%  |
|          | <i>ZMYND8</i>  | chr20:45915981      | c.721G>T          | p.E241X           | 5%  |
|          | <i>DNMT3A</i>  | chr2:25467132       | c.1743G>T         | p.W581C           | 12% |
|          | <i>TTI1</i>    | chr20:36640424      | c.1795G>T         | p.E599X           | 7%  |
|          | <i>TRIO</i>    | chr5:14474171       | c.6048C>A         | p.F2016L          | 7%  |



|        |               |                |            |         |     |
|--------|---------------|----------------|------------|---------|-----|
| ECD-10 | <i>BRAF</i>   | chr7:140453136 | c.1799A>T  | p.V600E | 5%  |
|        | <i>ARAF</i>   | chrX:47430341  | c.1616C>A  | p.P539H | 2%  |
|        | <i>MAPK9</i>  | chr5:179663476 | c.1183G>T  | p.D395Y | 7%  |
|        | <i>STAT2</i>  | chr12:56737909 | c.2101G>T  | p.E701X | 6%  |
|        | <i>BCL2</i>   | chr18:60795947 | c.631G>T   | p.D211Y | 10% |
|        | <i>AURKB</i>  | chr17:8110666  | c.226G>T   | p.D76Y  | 7%  |
|        | <i>YES1</i>   | chr18:743416   | c.725-1G>T | N/A     | 5%  |
|        | <i>GAK</i>    | chr4:887695    | c.844G>T   | p.D282Y | 6%  |
| ECD-11 | <i>BRAF</i>   | chr7:140453136 | c.1799A>T  | p.V600E | N/A |
| ECD-12 | <i>BRAF</i>   | chr7:140453136 | c.1799A>T  | p.V600E | 4%  |
| ECD-13 | <i>BRAF</i>   | chr7:140453136 | c.1799A>T  | p.V600E | 2%  |
| ECD-14 | <i>BRAF</i>   | chr7:140453136 | c.1799A>T  | p.V600E | N/A |
| ECD-15 | <i>BRAF</i>   | chr7:140453136 | c.1799A>T  | p.V600E | N/A |
| ECD-16 | <i>BRAF</i>   | chr7:140453136 | c.1799A>T  | p.V600E | N/A |
| ECD-17 | <i>BRAF</i>   | chr7:140453136 | c.1799A>T  | p.V600E | N/A |
| ECD-18 | <i>BRAF</i>   | chr7:140453136 | c.1799A>T  | p.V600E | N/A |
| ECD-19 | <i>BRAF</i>   | chr7:140453136 | c.1799A>T  | p.V600E | N/A |
| ECD-20 | <i>BRAF</i>   | chr7:140453136 | c.1799A>T  | p.V600E | N/A |
| ECD-21 | <i>BRAF</i>   | chr7:140453136 | c.1799A>T  | p.V600E | 5%  |
|        | <i>ARID5B</i> | chr10:63700037 | c.372C>G   | p.F124L | 6%  |
| ECD-22 | <i>BRAF</i>   | chr7:140453136 | c.1799A>T  | p.V600E | N/A |
| ECD-23 | <i>BRAF</i>   | chr7:140453136 | c.1799A>T  | p.V600E | N/A |
| ECD-24 | <i>BRAF</i>   | chr7:140453136 | c.1799A>T  | p.V600E | N/A |
| ECD-25 | <i>BRAF</i>   | chr7:140453136 | c.1799A>T  | p.V600E | N/A |
| ECD-26 | <i>BRAF</i>   | chr7:140453136 | c.1799A>T  | p.V600E | N/A |
| ECD-27 | <i>BRAF</i>   | chr7:140453136 | c.1799A>T  | p.V600E | N/A |
| ECD-28 | <i>BRAF</i>   | chr7:140453136 | c.1799A>T  | p.V600E | N/A |
| ECD-29 | <i>BRAF</i>   | chr7:140453136 | c.1799A>T  | p.V600E | N/A |
| ECD-30 | <i>BRAF</i>   | chr7:140453136 | c.1799A>T  | p.V600E | N/A |
| ECD-31 | <i>BRAF</i>   | chr7:140453136 | c.1799A>T  | p.V600E | N/A |

|        |               |                 |                       |                     |     |
|--------|---------------|-----------------|-----------------------|---------------------|-----|
| ECD-32 | <i>BRAF</i>   | chr7:140453136  | c.1799A>T             | p.V600E             | N/A |
| ECD-33 | <i>BRAF</i>   | chr7:140453136  | c.1799A>T             | p.V600E             | N/A |
| ECD-34 | <i>BRAF</i>   | chr7:140453136  | c.1799A>T             | p.V600E             | N/A |
| ECD-35 | <i>BRAF</i>   | chr7:140453136  | c.1799A>T             | p.V600E             | N/A |
| ECD-36 | <i>BRAF</i>   | chr7:140453136  | c.1799A>T             | p.V600E             | N/A |
| ECD-37 | <i>BRAF</i>   | chr7:140453136  | c.1799A>T             | p.V600E             | N/A |
| ECD-38 | <i>BRAF</i>   | chr7:140453136  | c.1799A>T             | p.V600E             | 3%  |
| ECD-39 | <i>BRAF</i>   | chr7:140453136  | c.1799A>T             | p.V600E             | N/A |
| ECD-40 | <i>BRAF</i>   | chr7:140453136  | c.1799A>T             | p.V600E             | N/A |
| ECD-41 | <i>BRAF</i>   | chr7:140453136  | c.1799A>T             | p.V600E             | N/A |
| ECD-42 | <i>BRAF</i>   | chr7:140453136  | c.1799A>T             | p.V600E             | N/A |
| ECD-43 | <i>BRAF</i>   | chr7:140453136  | c.1799A>T             | p.V600E             | N/A |
| ECD-44 | <i>BRAF</i>   | chr7:140453136  | c.1799A>T             | p.V600E             | N/A |
| ECD-45 | <i>BRAF</i>   | chr7:140453136  | c.1799A>T             | p.V600E             | N/A |
| ECD-46 | <i>BRAF</i>   | chr7:140453136  | c.1799A>T             | p.V600E             | 2%  |
| ECD-47 | <i>MAP2K1</i> | chr15:66727455  | c.171G>C              | p.K57N              | 7%  |
|        | <i>CHD4</i>   | chr12:6692417   | c.4007G>A             | p.G1336E            | 9%  |
| ECD-48 | <i>MAP2K1</i> | chr15:66727486  | c.202T>C              | p.F68L              | 11% |
| ECD-49 | <i>MAP2K1</i> | chr15:66729153  | c.361T>A              | p.C121S             | 3%  |
|        | <i>MAP4K5</i> | chr14:50930796  | c.293delA             | p.R265Dfs*8         | 4%  |
| ECD-50 | <i>MAP2K1</i> | chr15: 66729100 | c.308_316delAAAACCCGC | p.I103_A106del      | 12% |
|        | <i>MAP4K3</i> | chr2:39535126   | c.1077G>C             | p.L359F             | 14% |
|        | <i>ETV1</i>   | chr7:14027776   | c.68A>C               | p.N23T              | 16% |
| ECD-51 | <i>MAP2K1</i> | chr15: 66729163 | c.371C>T              | p.P124L             | 2%  |
| ECD-52 | <i>MAP2K1</i> | chr15: 66729106 | c.314_319del          | p. P105_I107delinsL | 6%  |
|        | <i>NF1</i>    | chr17:29486043  | c.220G>T              | p.A74S              | 6%  |
|        | <i>STAT3</i>  | chr17:40485757  | c.983G>A              | p.C328Y             | 6%  |
|        | <i>ROR2</i>   | chr9:94486813   | c.1963C>A             | p.P655T             | 7%  |
|        | <i>WNT7A</i>  | chr3:13896197   | c.402C>A              | p.D134E             | 10% |
|        | <i>SETD2</i>  | chr3:47098416   | c.6858C>A             | p.Y2286X            | 7%  |
|        | <i>APAF1</i>  | chr12:99080525  | c.2179-1G>T           | N/A                 | 8%  |
|        | <i>PLCE1</i>  | chr10:96022489  | c.4053G>T             | p.Q1351H            | 7%  |
|        | <i>GRIN2A</i> | chr16:10274124  | c.145C>A              | p.R49S              | 7%  |

|        |                |                   |                                          |                  |     |
|--------|----------------|-------------------|------------------------------------------|------------------|-----|
| ECD-53 | <i>MAP2K1</i>  | chr15:66727451    | c.167A>C                                 | p.Q56P           | 2%  |
|        | <i>NDRG2</i>   | chr14:21489989    | c.352C>A                                 | p.L132M          | 7%  |
|        | <i>FOXO4</i>   | chrX:70316418     | c.40G>T                                  | p.A14S           | 8%  |
|        | <i>NDRG1</i>   | chr8:134276808    | c.187C>A                                 | p.H63Q           | 5%  |
|        | <i>PTPN13</i>  | chr4:87692395     | c.4890G>T                                | p.E1630D         | 7%  |
|        | <i>THBS1</i>   | chr15:39884902    | c.2666G>T                                | p.G889V          | 9%  |
| ECD-54 | <i>MAP2K1</i>  | chr15:66727434    | c.151_174delGAGGCCTTTC<br>TTACCCAGAAGCAG | p.E51_Q58del     | 7%  |
|        | <i>STAT5A</i>  | chr17:40462649    | c.2347G>T                                | p.A783S          | 14% |
|        | <i>KMT2C</i>   | chr7:151878809    | c.6136C>A                                | p.P2046T         | 5%  |
|        | <i>EGR1</i>    | chr5:137801684    | c.234_236delCAG                          | p.S84delS        | 10% |
|        | <i>CASP5</i>   | chr11:104879687   | c.66_67delAA                             | p.R23Kfs*3       | 3%  |
|        | <i>KDSR</i>    | chr18:61002524    | c.845C>A                                 | p.A282D          | 15% |
| ECD-55 | <i>MAP2K1</i>  | chr15:66729163    | c.371C>A                                 | p.P124Q          | 2%  |
|        | <i>MAP3K10</i> | chr19:40719615    | c.2029G>A                                | p.G677S          | 8%  |
|        | <i>ARID1A</i>  | chr1:27023246     | c.352A>C                                 | p.T118P          | 13% |
|        | <i>EWSR1</i>   | chr22:29684681    | c.880A>T                                 | p.M300L          | 6%  |
|        | <i>CCAR1</i>   | chr10:70516223    | c.1819G>A                                | p.E607K          | 15% |
|        | <i>CEBPA</i>   | chr19:33793295    | c.26C>T                                  | p.A9V            | 12% |
|        | <i>NPAS2</i>   | chr2:101565835    | c.491G>A                                 | p.S164N          | 9%  |
| ECD-56 | <i>MAP2K1</i>  | chr15:66727443    | c.159T>A                                 | p.F53L           | 9%  |
| ECD-57 | <i>MAP2K1</i>  | chr15:66727451    | c.167A>C                                 | p.Q56P           | 3%  |
| ECD-58 | <i>MAP2K1</i>  | chr15:66727443    | c.159_173delTCTTACCCAG<br>AAGCA          | p.F53_Q58delinsL | 18% |
| ECD-59 | <i>MAP2K1</i>  | chr15:66727457    | c.169_183delCAGAAGGTGG<br>GAGAA          | p.Q58_E62del     | N/A |
| ECD-60 | <i>MAP2K1</i>  | chr15:15:66729094 | c.302_307delTGGAGA                       | p.E102_I103delEI | N/A |
| ECD-61 | <i>MAP2K1</i>  | chr15:66729159    | c.367T>C                                 | p.S123P          | N/A |
| ECD-62 | <i>MAP2K1</i>  | chr15:66729222    | c.430G>A                                 | p.E144K          | N/A |
| ECD-63 | <i>MAP2K1</i>  | chr15:66729222    | c.430G>A                                 | p.E144K          | N/A |
| ECD-64 | <i>MAP2K1</i>  | chr15:66729159    | c.367T>A                                 | p.S123T          | N/A |
| ECD-65 | <i>MAP2K1</i>  | chr15:66727453    | c.169A>G                                 | p.K57E           | N/A |
| ECD-66 | <i>MAP2K1</i>  | chr15:66727451    | c.167A>C                                 | p.Q56P           | 8%  |
|        | <i>EP400</i>   | chr12:132547093   | c.8181_8182insCAG                        | p.Q2727delinsQQ  | 12% |
| ECD-67 | <i>MAP2K1</i>  | chr15:66729222    | c.430G>A                                 | p.E144K          | N/A |
| ECD-68 | <i>MAP2K1</i>  | chr15:66727443    | c.159T>A                                 | p.F53L           | 22% |
| ECD-69 | <i>KRAS</i>    | chr12:25398285    | c.34G>A                                  | p.G12S           | 30% |

|        |               |                 |                 |                   |     |
|--------|---------------|-----------------|-----------------|-------------------|-----|
| ECD-70 | <i>KRAS</i>   | chr12:25398262  | c.57G>C         | p.L19F            | 2%  |
| ECD-71 | <i>KRAS</i>   | chr12:25398286  | c.34G>C         | p.G12R            | 23% |
|        | <i>ARAF</i>   | chrX:47426126   | c.646C>G        | p.P216A           | 11% |
|        | <i>DNMT3A</i> | chr2:25466799   | c.1904G>C       | p.R635P           | 20% |
|        | <i>DNMT3A</i> | chr2:25463286   | c.2207G>A       | p.R736H           | 19% |
| ECD-72 | <i>KRAS</i>   | chr12:25398281  | c.38G>A         | p.G13D            | 32% |
|        | <i>TP53</i>   | chr17:7578274   | c.572_574delCTC | p.P191del         | 57% |
|        | <i>PTEN</i>   | chr10:89685281  | c.179delA       | p.K60fs           | 59% |
| ECD-73 | <i>KRAS</i>   | chr12:25398284  | c.35G>A         | p.G12D            | 18% |
| ECD-74 | <i>KRAS</i>   | chr12:25378553  | c.445A>G        | p.R49G            | 2%  |
|        | <i>MAP4K5</i> | chr14:50930796  | c.293delA       | p.R265Dfs*8       | 6%  |
| ECD-75 | <i>NRAS</i>   | chr1:115256529  | c.182A>G        | p.Q61R            | 50% |
|        | <i>GTF2F1</i> | chr19:6381791   | c.751_753del    | p.K251del         | 11% |
|        | <i>ATXN1</i>  | chr6:16327915   | c.626_627insGCA | p.H209delinsQH    | 20% |
|        | <i>CHD7</i>   | chr8:61766036   | c.6752C>T       | p.S2251L          | 47% |
| ECD-76 | <i>NRAS</i>   | chr1:115256530  | c.181C>A        | p.Q61K            | N/A |
| ECD-77 | <i>NRAS</i>   | chr1:115256529  | c.182A>G        | p.Q61R            | N/A |
| ECD-78 | <i>NRAS</i>   | chr1:115258747  | c.35G>A         | p.G12D            | N/A |
| ECD-79 | <i>ARAF</i>   | chrX:47426154   | c.C674C>T       | p.A225V           | 3%  |
|        | <i>TAOK2</i>  | chr16:29994531  | c.1138_1140del  | p.E380del         | 10% |
|        | <i>AR</i>     | chrX:66766390   | c.1402delG      | p.G468fs          | 25% |
|        | <i>MUC4</i>   | chr 3:195508402 | c.10049C>A      | p.T3350N          | 4%  |
| ECD-80 | <i>ARAF</i>   | chrX:47426120   | c.640T>G        | p.S214A           | 8%  |
|        | <i>HUNK</i>   | chr21:33312540  | c.610+8T>-      | N/A               | 13% |
|        | <i>INO80E</i> | chr16:30016629  | c.602dupC       | p.T201fs          | 24% |
|        | <i>CSPG4</i>  | chr15:75982058  | c.1348T>A       | p.R450W           | 7%  |
| ECD-81 | <i>ARAF</i>   | chrX: 47426163  | c.683A>T        | p.D228V           | N/A |
| ECD-82 | <i>ARAF</i>   | chrX:47426121   | c.641C>T        | p.S214F           | 22% |
|        | <i>DNMT3A</i> | chr2:25497943   | c.505delC       | p.R169Gfs*56      | 8%  |
|        | <i>DNMT3A</i> | chr2:25457287   | c.2599delG      | p.V867Yfs*14      | 25% |
| ECD-83 | <i>PIK3CA</i> | chr3:178936082  | c.1624G>A       | p.E542K           | N/A |
| ECD-84 | <i>PIK3CA</i> | chr3:178936091  | c.1633G>A       | p.E545K           | N/A |
| ECD-85 | <i>PIK3CA</i> | chr3:178952085  | c.3140A>G       | p.H1047R          | N/A |
| ECD-86 | <i>MAP2K2</i> | chr19: 4110557  | c.400T>C        | p.Y134H           | 6%  |
|        | <i>NOTCH3</i> | chr19:15311677  | c.29_40del12    | p.R10_R13delIRRRR | 12% |

|         |                         |                 |                                   |                |     |
|---------|-------------------------|-----------------|-----------------------------------|----------------|-----|
| ECD-87  | <i>MAP2K2</i>           | chr19:4110557   | c.400T>C                          | p.Y134H        | 12% |
| ECD-88  | <i>CSF1R</i>            | chr5:149450060  | c.1157C>T                         | p.P386L        | 44% |
| ECD-89  | <i>BRAF</i>             | chr7:140477836  | c.1457_1471delATGTGACAG<br>CACCTA | p.N486_P490del | 14% |
| ECD-90  | <i>RAF1</i>             | chr3:12653451   | c.318A>C                          | p.K106N        | 2%  |
| ECD-91  | <i>KIF5B-ALK</i>        | N/A             | N/A                               | N/A            | N/A |
|         | <i>MAP4K4</i>           | chr2:102456430  | c.923G>A                          | p.R308H        | 30% |
|         | <i>RALGAPA1</i>         | chr14:36142064  | c.3696+9A>C                       | N/A            | 17% |
|         | <i>HUNK</i>             | chr21:33312540  | c.610+8T>-                        | N/A            | 36% |
|         | <i>EP400</i>            | chr12:132539513 | c.7729-6A>T                       | N/A            | 7%  |
|         | <i>KMT2C</i>            | chr7:151932897  | c.2769+5G>T                       | N/A            | 6%  |
|         | <i>KMT2C</i>            | chr7:151962113  | c.1184+10C>A                      | N/A            | 4%  |
|         | <i>INO80E</i>           | chr16:30016629  | c.602dupC                         | p.T201fs       | 20% |
|         | <i>AFF3</i>             | chr2:100218011  | c.1255_1257del                    | p.S419del      | 11% |
| ECD-92  | <i>KIF5B-ALK</i>        | N/A             | N/A                               | N/A            | N/A |
|         | <i>DNMT3A</i>           | chr2:25457242   | c.2645G>A                         | p.R882H        | 34% |
|         | <i>BRCA1</i>            | chr7:41199675   | c.5452G>A                         | p.D1818N       | 5%  |
| ECD-93  | <i>KIF5B-ALK</i>        | N/A             | N/A                               | N/A            | N/A |
| ECD-94  | <i>BRAF-<br/>PICALM</i> | N/A             | N/A                               | N/A            | N/A |
| ECD-95  | <i>ANP32A-<br/>BRAF</i> | N/A             | N/A                               | N/A            | N/A |
| ECD-96  | <i>LMNA-<br/>NTRK1</i>  | N/A             | N/A                               | N/A            | N/A |
| ECD-97  | <i>Driver WT</i>        | N/A             | N/A                               | N/A            | N/A |
|         | <i>WISP3</i>            | chr6:112389433  | c.669_670insA                     | p.C227Mfs*21   | 5%  |
| ECD-98  | <i>Driver WT</i>        | N/A             | N/A                               | N/A            | N/A |
| ECD-99  | <i>Driver WT</i>        | N/A             | N/A                               | N/A            | N/A |
| ECD-100 | <i>Driver WT</i>        | N/A             | N/A                               | N/A            | N/A |

Abbreviations: Erdheim-Chester Disease (ECD); variant allele frequency (VAF); wild type (WT); not applicable (N/A)

Supplementary Table 3: Somatic genetic alterations in Langerhans Cell Histiocytosis Cohort.

| Study ID | Gene           | Genomic Coordinates | Genomic Variant                   | Amino Acid Change      | VAF |
|----------|----------------|---------------------|-----------------------------------|------------------------|-----|
| LCH-1    | <i>BRAF</i>    | chr7:140453136      | c.1799A>T                         | p.V600E                | 28% |
|          | <i>DIAPH1</i>  | chr5:140907266      | c.3149-2->TTT                     | N/A                    | 27% |
|          | <i>KMT2C</i>   | chr7:151932949      | c.2722G>T                         | p.G908C                | 5%  |
|          | <i>PDS5B</i>   | chr13:33344888      | c.4161delA                        | p.P1387fs              | 11% |
|          | <i>TOX3</i>    | chr16:52473513      | c.1338_1340del                    | p.Q447del              | 15% |
|          | <i>KRT1</i>    | chr12:53069223      | c.1669_1689del                    | p.S557_G563del         | 43% |
|          | <i>CSPG4</i>   | chr15:75982085      | c.G1321G>A                        | p.E441K                | 7%  |
| LCH-2    | <i>BRAF</i>    | chr7:140453136      | c.1799A>T                         | p.V600E                | 11% |
|          | <i>BRAF</i>    | chr7:140453127      | c.G1808C>T                        | p.R603Q                | 13% |
|          | <i>MED12</i>   | chrX:70361098       | c.6286_6288del                    | p.Q2096del             | 11% |
|          | <i>PHF2</i>    | chr9:96439004       | c.2961_2962insCCTGCCTCC<br>ACCACA | p.T987delinsTPAST<br>T | 30% |
|          | <i>MN1</i>     | chr22:28195603      | c.927_929del                      | p.Q309del              | 11% |
| LCH-3    | <i>BRAF</i>    | chr7:140453136      | c.1799A>T                         | p.V600E                | 14% |
|          | <i>GTF2F1</i>  | chr19:6381410       | c.976_978del                      | p.E326del              | 15% |
|          | <i>EP400</i>   | chr12:132547068     | c.8156_8157insGCA                 | p.R2719delinsRQ        | 39% |
|          | <i>MED15</i>   | chr22:20918916      | c.631_633del                      | p.Q211del              | 16% |
|          | <i>PHF2</i>    | chr9:96439004       | c.2961_2962insCCTGCCTCC<br>ACCACA | p.T987delinsTPAST<br>T | 48% |
|          | <i>THAP11</i>  | chr16:67876824      | c.367_369del                      | p.Q123del              | 19% |
|          | <i>ATXN1</i>   | chr6:16327915       | c.626_627insGCA                   | p.H209delinsQH         | 20% |
|          | <i>HMGXB4</i>  | chr22:35661543      | c.1163dupA                        | p.E388fs               | 11% |
|          | <i>MN1</i>     | chr22:28194913      | c.1617_1619del                    | p.Q539del              | 10% |
| LCH-4    | <i>BRAF</i>    | chr7:140453136      | c.1799A>T                         | p.V600E                | 9%  |
|          | <i>AR</i>      | chrX:66765159       | c.171_173del                      | p.Q58del               | 14% |
|          | <i>AR</i>      | chrX:66766356       | c.1368_1369insGGC                 | p.G456delinsGG         | 25% |
|          | <i>CCNT1</i>   | chr12:49087434      | c.1561_1563del                    | p.H521del              | 15% |
| LCH-5    | <i>BRAF</i>    | chr7:140453136      | c.1799A>T                         | p.V600E                | 5%  |
|          | <i>GTF2F1</i>  | chr19:6381791       | c.751_753del                      | p.K251del              | 11% |
| LCH-6    | <i>BRAF</i>    | chr7:140453136      | c.1799A>T                         | p.V600E                | 7%  |
|          | <i>SYNGAP1</i> | chr6:33409086       | c.2050G>A                         | p.D684N                | 12% |
|          | <i>FAT1</i>    | chr4:187541913      | c.5827C>T                         | p.Q1943X               | 6%  |
|          | <i>CHD4</i>    | chr12:6711207       | c.355_357del                      | p.K119del              | 17% |
|          | <i>CHD4</i>    | chr12:6682390       | c.5407G>A                         | p.A1803T               | 15% |
|          | <i>MED12</i>   | chrX:70361098       | c.6286_6288del                    | p.Q2096del             | 11% |
|          | <i>MED15</i>   | chr22:20918817      | c.532_534del                      | p.Q178del              | 11% |
|          | <i>NCOA6</i>   | chr20:33334734      | c.2793-2->T                       | N/A                    | 27% |
|          | <i>WDR33</i>   | chr2:128467115      | c.3514C>T                         | p.R1172C               | 5%  |
|          | <i>ATRX</i>    | chrX:76907782       | c.4377_4379del                    | p.E1459del             | 11% |
|          | <i>USP8</i>    | chr15:50784950      | c.2287C>T                         | p.R763W                | 16% |
|          | <i>GAK</i>     | chr4:887704         | c.835C>T                          | p.P279S                | 8%  |
|          | <i>DNMT3B</i>  | chr20:31395621      | c.2474C>T                         | p.A825V                | 12% |

|        |                 |                |               |          |     |
|--------|-----------------|----------------|---------------|----------|-----|
| LCH-7  | <i>BRAF</i>     | chr7:140453136 | c.1799A>T     | p.V600E  | 13% |
|        | <i>ALK</i>      | chr2:29917863  | c.805G>T      | p.D269Y  | 9%  |
|        | <i>MAPK11</i>   | chr22:50704972 | c.679G>T      | p.D227Y  | 9%  |
|        | <i>MAP3K9</i>   | chr14:71227812 | c.908G>T      | p.R303L  | 5%  |
|        | <i>RALGAPA1</i> | chr14:36217952 | c.1090G>T     | p.E364X  | 4%  |
|        | <i>JAK2</i>     | chr9:5069158   | c.1463C>A     | p.S488X  | 5%  |
|        | <i>STAT6</i>    | chr12:57502001 | c.61G>T       | p.D21Y   | 5%  |
|        | <i>CSNK1G1</i>  | chr15:64496755 | c.884G>T      | p.R295L  | 5%  |
|        | <i>AMER2</i>    | chr13:25745341 | c.416_417insC | p.G140fs | 12% |
|        | <i>DDX11</i>    | chr12:31254916 | c.2202G>T     | p.K734N  | 7%  |
|        | <i>DDX43</i>    | chr6:74115452  | c.701G>T      | p.R234L  | 5%  |
|        | <i>NCOA1</i>    | chr2:24952429  | c.2946G>T     | p.L982F  | 5%  |
|        | <i>ZMYND8</i>   | chr20:45915981 | c.721G>T      | p.E241X  | 5%  |
|        | <i>AURKB</i>    | chr17:8110078  | c.527G>T      | p.R176L  | 7%  |
|        | <i>YES1</i>     | chr18:736929   | c.1170G>T     | p.M390I  | 6%  |
|        | <i>MUC4</i>     | chr3:195508598 | c.9853G>T     | p.D3285Y | 8%  |
|        | <i>CCNT1</i>    | chr12:49108266 | c.203G>T      | p.R68L   | 6%  |
|        | <i>CHD7</i>     | chr8:61766944  | c.6798G>T     | p.K2266N | 7%  |
|        | <i>TTI1</i>     | chr20:36627633 | c.2750G>T     | p.R917L  | 7%  |
|        | <i>CSPG4</i>    | chr15:75982702 | c.704G>T      | p.R235L  | 6%  |
| LCH-8  | <i>BRAF</i>     | chr7:140453136 | c.1799A>T     | p.V600E  | 11% |
| LCH-9  | <i>BRAF</i>     | chr7:140453136 | c.1799A>T     | p.V600E  | 16% |
| LCH-10 | <i>BRAF</i>     | chr7:140453136 | c.1799A>T     | p.V600E  | 16% |
| LCH-11 | <i>BRAF</i>     | chr7:140453136 | c.1799A>T     | p.V600E  | 18% |
|        | <i>FAT1</i>     | chr4:187539564 | c.8176C>T     | p.R2726* | 17% |
| LCH-12 | <i>BRAF</i>     | chr7:140453136 | c.1799A>T     | p.V600E  | 15% |
| LCH-13 | <i>BRAF</i>     | chr7:140453136 | c.1799A>T     | p.V600E  | N/A |
| LCH-14 | <i>BRAF</i>     | chr7:140453136 | c.1799A>T     | p.V600E  | 15% |
|        | <i>RET</i>      | chr10:43613908 | c.2372A>T     | p.Y791F  | 52% |
|        | <i>TNFAIP3</i>  | chr6:138202365 | c.2282G>A     | p.R761H  | 12% |
|        | <i>SMO</i>      | chr7:128829195 | c.203C>G      | p.A68G   | 45% |
|        | <i>FBXO11</i>   | chr2:48132717  | c.143C>T      | p.P48L   | 53% |
|        | <i>KMT2C</i>    | chr7:151932996 | c.2675G>A     | p.G892E  | 42% |
|        | <i>ASXL1</i>    | chr20:31023288 | c.2773C>T     | p.Q925X  | 23% |
|        | <i>TET2</i>     | chr4:106158497 | c.3398G>A     | p.C1133Y | 17% |
|        | <i>NSD1</i>     | chr5:176637725 | c.2325A>T     | p.Q775H  | 44% |
| LCH-15 | <i>BRAF</i>     | chr7:140453136 | c.1799A>T     | p.V600E  | 15% |
|        | <i>ASXL1</i>    | chr20:31022851 | c.2336C>T     | p.P779L  | 42% |
|        | <i>TET2</i>     | chr4:106196382 | c.4715G>A     | p.R1572Q | 44% |
|        | <i>TRAF7</i>    | chr16:2220633  | c.250C>T      | p.R84C   | 44% |
| LCH-16 | <i>BRAF</i>     | chr7:140453136 | c.1799A>T     | p.V600E  | 11% |
|        | <i>INSR</i>     | chr19:7141693  | c.2677G>A     | p.D893N  | 44% |
| LCH-17 | <i>BRAF</i>     | chr7:140453136 | c.1799A>T     | p.V600E  | 21% |

|               |                 |                  |                       |                             |     |
|---------------|-----------------|------------------|-----------------------|-----------------------------|-----|
|               | <i>STK19</i>    | chr6:31939866    | c.94_96del            | p.K32del                    | 43% |
|               | <i>TP53</i>     | chr17: 7577099   | c.839G>C              | p.R280T                     | 4%  |
| <b>LCH-18</b> | <i>BRAF</i>     | chr7:140453136   | c.1799A>T             | p.V600E                     | 18% |
|               | <i>BRCA2</i>    | chr13: 32911562  | c.3071_3073del        | p. I1024del                 | 52% |
| <b>LCH-19</b> | <i>BRAF</i>     | chr7:140453136   | c.1799A>T             | p.V600E                     | 10% |
|               | <i>LATS1</i>    | chr6:150022977   | c.286C>T              | p.R96W                      | 56% |
|               | <i>MDC1</i>     | chr6:30681077    | c.618_642delinsG      | p.G207_F214delIGL<br>GPPFAF | 38% |
|               | <i>FANCA</i>    | chr16: 89813084  | c.3421G>A             | p.A1141T                    | 55% |
| <b>LCH-20</b> | <i>BRAF</i>     | chr7:140453136   | c.1799A>T             | p.V600E                     | 13% |
|               | <i>FAT1</i>     | chr4:187557941   | c.3770G>T             | p.R1257L                    | 31% |
|               | <i>HIST1H3A</i> | chr6: 26020781   | c.64G>C               | p.A22T                      | 49% |
| <b>LCH-21</b> | <i>BRAF</i>     | chr7:140453136   | c.1799A>T             | p.V600E                     | 4%  |
|               | <i>SETD4</i>    | chr21: 37420648  | c.254C>A              | p.T85K                      | 55% |
|               | <i>PARP1</i>    | chr1: 226558164  | c.2125G>A             | p.A709T                     | 48% |
| <b>LCH-22</b> | <i>BRAF</i>     | chr7:140453136   | c.1799A>T             | p.V600E                     | 8%  |
|               | <i>NOTCH3</i>   | chr19:15271928   | c.6511G>A             | p.D2171N                    | 39% |
|               | <i>EP400</i>    | chr12: 132547058 | c.8146C>T             | p.Q2716*                    | 37% |
|               | <i>FGF3</i>     | chr11: 69625189  | c.604C>T              | p.P202S                     | 42% |
| <b>LCH-23</b> | <i>BRAF</i>     | chr7:140453135   | c.1799_1800delinsAT   | p.V600E                     | 25% |
|               | <i>NKX2-1</i>   | chr14:36986875   | c.805_813dupGGCGGGGGC | p.G269_G271dup              | 48% |
|               | <i>SETD1A</i>   | chr16: 30991240  | c.4147_4149dup        | p.S1383dup                  | 39% |
|               | <i>CD58</i>     | chr1:117057436   | c.752G>C              | p.*251Sext*15               | 36% |
|               | <i>NF1</i>      | chr17:29533315   | c.1318C>T             | p.R440X                     | 2%  |
| <b>LCH-24</b> | <i>BRAF</i>     | chr7:140453136   | c.1799A>T             | p.V600E                     | 13% |
|               | <i>KEAP1</i>    | chr19:10610439   | c.271G>A              | p.A91T                      | 27% |
|               | <i>MDC1</i>     | chr6:30671949    | c.5011A>G             | p.T1671A                    | 53% |
|               | <i>ESCO2</i>    | chr8: 27645520   | c.1131+1G>A           | p.X377_splice               | 36% |
| <b>LCH-25</b> | <i>BRAF</i>     | chr7:140453136   | c.1799A>T             | p.V600E                     | 6%  |
| <b>LCH-26</b> | <i>BRAF</i>     | chr7:140453136   | c.1799A>T             | p.V600E                     | 23% |
| <b>LCH-27</b> | <i>BRAF</i>     | chr7:140453136   | c.1799A>T             | p.V600E                     | 30% |
| <b>LCH-28</b> | <i>BRAF</i>     | chr7:140453136   | c.1799A>T             | p.V600E                     | 18% |
| <b>LCH-29</b> | <i>BRAF</i>     | chr7:140453136   | c.1799A>T             | p.V600E                     | 9%  |
| <b>LCH-30</b> | <i>BRAF</i>     | chr7:140453136   | c.1799A>T             | p.V600E                     | 13% |
| <b>LCH-31</b> | <i>BRAF</i>     | chr7:140453136   | c.1799A>T             | p.V600E                     | 14% |
| <b>LCH-32</b> | <i>BRAF</i>     | chr7:140453136   | c.1799A>T             | p.V600E                     | 25% |
| <b>LCH-33</b> | <i>BRAF</i>     | chr7:140453136   | c.1799A>T             | p.V600E                     | 36% |



|        |                 |                 |                                 |                |     |
|--------|-----------------|-----------------|---------------------------------|----------------|-----|
| LCH-34 | <i>BRAF</i>     | chr7:140453136  | c.1799A>T                       | p.V600E        | 5%  |
| LCH-35 | <i>BRAF</i>     | chr7:140453136  | c.1799A>T                       | p.V600E        | 18% |
| LCH-36 | <i>BRAF</i>     | chr7:140453136  | c.1799A>T                       | p.V600E        | 25% |
| LCH-37 | <i>BRAF</i>     | chr7:140453136  | c.1799A>T                       | p.V600E        | 4%  |
| LCH-38 | <i>BRAF</i>     | chr7:140453136  | c.1799A>T                       | p.V600E        | 2%  |
| LCH-39 | <i>BRAF</i>     | chr7:140453136  | c.1799A>T                       | p.V600E        | 18% |
|        | <i>FAT1</i>     | chr4:187539564  | c.8176C>T                       | p.R2726X       | 17% |
| LCH-40 | <i>BRAF</i>     | chr7:140453136  | c.1799A>T                       | p.V600E        | 16% |
| LCH-41 | <i>BRAF</i>     | chr7:140453136  | c.1799A>T                       | p.V600E        | 11% |
|        | <i>TET2</i>     | chr4:106155916  | c.817C>T                        | p.Q273X        | 30% |
| LCH-42 | <i>BRAF</i>     | chr7:140453136  | c.1799A>T                       | p.V600E        | 14% |
|        | <i>EPAS1</i>    | chr2:46608749   | c.2060T>C                       | p.F687S        | 44% |
|        | <i>HIST1H1D</i> | chr6:26235112   | c.50A>G                         | p.K17R         | 47% |
|        | <i>NCOR2</i>    | chr12:124915248 | c.968G>A                        | p.R323Q        | 47% |
| LCH-43 | <i>BRAF</i>     | chr7:140453136  | c.1799A>T                       | p.V600E        | 10% |
|        | <i>PTPRS</i>    | chr19:5219993   | c.3722G>A                       | p.R1241H       | 38% |
|        | <i>CD274</i>    | chr9:5462858    | c.419G>C                        | p.R140T        | 46% |
| LCH-44 | <i>BRAF</i>     | chr7:140453136  | c.1799A>T                       | p.V600E        | 10% |
| LCH-45 | <i>BRAF</i>     | chr7:140453136  | c.1799A>T                       | p.V600E        | 4%  |
|        | <i>KRAS</i>     | chr12:25398285  | c.34G>A                         | p.G12S         | 3%  |
| LCH-46 | <i>BRAF</i>     | chr7:140453136  | c.1799A>T                       | p.V600E        | 16% |
| LCH-47 | <i>BRAF</i>     | chr7:140453136  | c.1799A>T                       | p.V600E        | 12% |
|        | <i>FLT4</i>     | chr5:180056400  | c.844C>T                        | p.R282X        | 13% |
| LCH-48 | <i>BRAF</i>     | chr7:140453136  | c.1799A>T                       | p.V600E        | 3%  |
| LCH-49 | <i>BRAF</i>     | chr7:140453136  | c.1799A>T                       | p.V600E        | 2%  |
|        | <i>NRAS</i>     | chr1:115258747  | c.35G>A                         | p.G12D         | 23% |
| LCH-50 | <i>BRAF</i>     | chr7:140453136  | c.1799A>T                       | p.V600E        | 9%  |
| LCH-51 | <i>MAP2K1</i>   | chr15:66727443  | c.159_173delTCTTACCCAG<br>AAGCA | p.F53_Q58del   | 15% |
|        | <i>SYNGAP1</i>  | chr6:33419606   | c.3956dupC                      | p.A1319fs      | 14% |
|        | <i>DIAPH1</i>   | chr5:140953564  | c.1851_1853del                  | p.P618del      | 20% |
|        | <i>MED15</i>    | chr22:20918916  | c.631_633del                    | p.Q211del      | 17% |
|        | <i>NCOA6</i>    | chr20:33334734  | c.2793-2->T                     | N/A            | 29% |
|        | <i>KRT1</i>     | chr12:53069189  | c.1722_1723insGGC               | p.H575delinsGH | 11% |

|        |                |                |                                 |                  |      |
|--------|----------------|----------------|---------------------------------|------------------|------|
| LCH-52 | <i>MAP2K1</i>  | chr15:66727457 | c.169_183delCAGAAGGTGG<br>GAGAA | p.Q58_E62del     | 21%  |
|        | <i>FIP1L1</i>  | chr4:54319248  | c.1447_1448del                  | p.R483fs         | 15%  |
|        | <i>AFF3</i>    | chr2:100218011 | c.1255_1257del                  | p.S419del        | 18%  |
|        | <i>KRT1</i>    | chr12:53069223 | c.1669_1689del                  | p.S557_G563del   | 49%  |
| LCH-53 | <i>MAP2K1</i>  | chr15:66727457 | c.169_183delCAGAAGGTGG<br>GAGAA | p.Q58_E62del     | 23%  |
| LCH-54 | <i>MAP2K1</i>  | chr15:66727457 | c.169_183delCAGAAGGTGG<br>GAGAA | p.Q58_E62del     | 10%  |
|        | <i>PLEKHG5</i> | chr1:6529183   | c.2397_2399del                  | p.799_800del     | 16%  |
|        | <i>USP8</i>    | chr15:50784990 | c.2327T>C                       | p.L776P          | 5%   |
|        | <i>DKC1</i>    | chrX:154005089 | c.1492_1494del                  | p.K498del        | 13%  |
| LCH-55 | <i>MAP2K1</i>  | chr15:66729093 | c.303_309delGGAGAT              | p.E102_I103delEI | 6%   |
| LCH-56 | <i>MAP2K1</i>  | chr15:66727443 | c.159_173delTCTTACCCAG<br>AAGCA | p.F53_Q58delinsL | 18%  |
|        | <i>APC</i>     | chr5:112173918 | c.2627G>A                       | p.R876Q          | 49%  |
|        | <i>CTNNB1</i>  | chr3:41266178  | c.175A>G                        | p.T59A           | 50%  |
|        | <i>NOTCH1</i>  | chr9:139390908 | c.7283A>G                       | p.H2428R         | 55%  |
| LCH-57 | <i>MAP2K1</i>  | chr15:66729093 | c.303_309delGGAGAT              | p.E102_I103delEI | 9%   |
|        | <i>AXL</i>     | chr19:41763451 | c.2250T>G                       | p.S354X          | 57%  |
|        | <i>BARD1</i>   | chr2:215645537 | c.1061C>A                       | p.Y750X          | 44%  |
| LCH-58 | <i>MAP2K1</i>  | chr15:66727454 | c.170A>C                        | p.K57T           | 11%  |
| LCH-59 | <i>MAP2K1</i>  | chr15:66727457 | c.169_183delCAGAAGGTGG<br>GAGAA | p.Q58_E62del     | 14%  |
| LCH-60 | <i>MAP2K1</i>  | chr15:66729093 | c.303_309delGGAGAT              | p.E102_I103delEI | 14%  |
| LCH-61 | <i>MAP2K1</i>  | chr15:66729093 | c.303_309delGGAGAT              | p.E102_I103delEI | 23%  |
| LCH-62 | <i>MAP2K1</i>  | chr15:66727457 | c.169_183delCAGAAGGTGG<br>GAGAA | p.Q58_E62del     | 9%   |
|        | <i>HGF</i>     | chr7:81374403  | c.659G>A                        | p.R220Q          | 45%  |
|        | <i>ASXL2</i>   | chr2:25972764  | c.1661C>T                       | p.P554L          | 48%  |
| LCH-63 | <i>MAP2K1</i>  | chr15:66729093 | c.303_309delGGAGAT              | p.E102_I103delEI | 12%  |
| LCH-64 | <i>MAP2K1</i>  | chr15:66729093 | c.303_309delGGAGAT              | p.E102_I103delEI | 7%   |
| LCH-65 | <i>MAP2K1</i>  | chr15:66729093 | c.303_309delGGAGAT              | p.E102_I103delEI | 13%  |
|        | <i>MPL</i>     | chr1:43804317  | c.317C>T                        | p.P106L          | 47%  |
|        | <i>STAT3</i>   | chr17:40498652 | c.208C>T                        | p.R70C           | 6%   |
|        | <i>NOTCH1</i>  | chr9:139409061 | c.2108G>A                       | p.R703H          | 51%  |
|        | <i>NOTCH3</i>  | chr19:15296476 | c.1966G>A                       | p.V656M          | 48%  |
|        | <i>ARID1B</i>  | chr6:157100116 | c.1069_1071del                  | p.G357del        | 44%  |
|        | <i>TET3</i>    | chr2:74273751  | c.302G>T                        | p.S101I          | 53%  |
|        | <i>ZRSR2</i>   | chrX:15821844  | c.237G>T                        | p.E79D           | 100% |
|        | <i>ROBO1</i>   | chr3:78717402  | c.1680_1681delinsAG             | p.P561A          | 43%  |

|        |                     |                |                     |                  |     |
|--------|---------------------|----------------|---------------------|------------------|-----|
| LCH-66 | <i>MAP2K1</i>       | chr15:66729093 | c.303_309delGGAGAT  | p.E102_I103delEI | 13% |
|        | <i>DNMT3A</i>       | chr2:25469085  | c.1372delC          | p.R458Gfs*193    | 13% |
| LCH-67 | <i>BRAF</i>         | chr7:140477836 | c.1457_1471del15    | p.N486_P490del   | 1%  |
|        | <i>MAP2K6</i>       | chr17:67532249 | c.882-7C>T          | N/A              | 10% |
|        | <i>KMT2D</i>        | chr19:36211494 | c.1246dupC          | p.P415fs         | 14% |
|        | <i>PHF14</i>        | chr7:11101414  | c.2482-4C>T         | N/A              | 18% |
|        | <i>ASH1L</i>        | chr1:155408725 | c.5221G>A           | p.A1741T         | 5%  |
|        | <i>BPTF</i>         | chr17:65899951 | c.2968delA          | p.K990fs         | 11% |
|        | <i>MUC4</i>         | chr3:195508202 | c.10202_10249del    | p.3401_3417del   | 18% |
|        | <i>CCNB3</i>        | chrX:50037859  | c.205-4G>T          | N/A              | 10% |
|        | <i>ACIN1</i>        | chr14:23530733 | c.3371dupC          | p.P1124fs        | 12% |
|        | <i>NAE1</i>         | chr16:66855469 | c.135-7T>-          | N/A              | 27% |
|        | <i>RANBP9</i>       | chr6:13711709  | c.29C>A             | p.P10Q           | 8%  |
| LCH-68 | <i>BRAF</i>         | chr7:140477836 | c.1457_1471del15    | p.N486_P490del   | 12% |
| LCH-69 | <i>BRAF</i>         | chr7:140477836 | c.1457_1471del15    | p.N486_P490del   | 6%  |
| LCH-70 | <i>BRAF</i>         | chr7:140477836 | c.1457_1471del15    | p.N486_P490del   | 16% |
|        | <i>KMT2C</i>        | chr7:151859914 | c.10748C>T          | p.P3583L         | 49% |
| LCH-71 | <i>BRAF</i>         | chr7:140477836 | c.1457_1471del15    | p.N486_P490del   | 18% |
| LCH-72 | <i>BICD2-BRAF</i>   | N/A            | N/A                 | N/A              | N/A |
|        | <i>FLT1</i>         | chr13:28964143 | c.1759G>A           | p.V587I          | 9%  |
|        | <i>NOTCH3</i>       | chr19:15302639 | c.719G>C            | p.C240S          | 8%  |
|        | <i>MCL1</i>         | chr1:150551921 | c.86C>A             | p.T29N           | 9%  |
| LCH-73 | <i>CSF2RA-BRAF</i>  | N/A            | N/A                 | N/A              | N/A |
| LCH-74 | <i>PACSIN2-BRAF</i> | N/A            | N/A                 | N/A              | N/A |
| LCH-75 | <i>SPPL2A-BRAF</i>  | N/A            | N/A                 | N/A              | N/A |
| LCH-76 | <i>BRAF</i>         | chr7:140453135 | c.1799_1800delinsAT | p.V600D          | 10% |
| LCH-77 | <i>BRAF</i>         | chr7:140494190 | c.1058A>G           | p.H353R          | 50% |
|        | <i>BRAF</i>         | chr7:140477788 | c.1511_1517+2dup    | p.X504_splice    | 33% |
|        | <i>HGF</i>          | chr7:81334774  | c.1942G>A           | p.G648R          | 52% |
|        | <i>INPPL1</i>       | chr11:71948712 | c.3424C>T           | p.R1142C         | 54% |
| LCH-78 | <i>ARAF</i>         | chrX:47426444  | c.787G>A            | p.V263M          | 93% |
|        | <i>TNFRSF14</i>     | chr1:2494316   | c.711_726+2del      | p.KVIVSVQdel     | 37% |
| LCH-79 | <i>PIK3CD</i>       | chr1:9787030   | c.3061G>A           | p.E1021K         | 26% |
|        | <i>CSF1R</i>        | chr5:149449579 | c.1347_1367del      | p.W450_E456del   | 23% |
|        | <i>PDGFRB</i>       | chr5:149501449 | c.2338C>T           | p.P780S          | 31% |
|        | <i>NOTCH1</i>       | chr9:139391176 | c.7014_7015insT     | p.A2339Cfs*15    | 27% |
|        | <i>ASXL1</i>        | chr20:31024701 | c.4186G>T           | p.V1396L         | 51% |
|        | <i>CCND3</i>        | chr6:41903803  | c.753_754insGTCCCTC | p.R252Vfs*74     | 22% |

|        |                     |                 |                       |                |     |
|--------|---------------------|-----------------|-----------------------|----------------|-----|
| LCH-80 | <i>MAPK3 (ERK1)</i> | chr16:30129852  | c.361G>A)             | p.V121M        | 9%  |
|        | <i>TET2</i>         | chr4:106156424  | c.1326del             | p.N442Kfs*5    | 7%  |
|        | <i>TET2</i>         | chr4:106164778  | c.3646C>G             | p.R1216G       | 9%  |
|        | <i>TET2</i>         | chr4:106196985  | c.5319dupC            | p.N1774Qfs*15  | 6%  |
|        | <i>ETNK1</i>        | chr12:22811995  | c.731A>G              | p.N244S        | 4%  |
| LCH-81 | <i>MAPK7 (ERK5)</i> | chr17:19284721  | c.1199G>T             | p.R400L        | 6%  |
|        | <i>GNAQ</i>         | chr9:80537095   | c.303C>A              | p.Y101X        | 6%  |
|        | <i>MAP3K4</i>       | chr6:161530795  | c.4095G>T             | p.M1415I       | 7%  |
|        | <i>DNAJC27</i>      | chr2:25179912   | c.528G>T              | p.Q176H        | 8%  |
|        | <i>CARD11</i>       | chr7:2983990    | c.540C>A              | p.Y180X        | 8%  |
|        | <i>TCF7L2</i>       | chr10:114925316 | c.1394_1395insA       | p.C469Vfs*8    | 12% |
|        | <i>E2F1</i>         | chr20:32267696  | c.437C>A              | p.S146X        | 8%  |
|        | <i>DNMT3A</i>       | chr2:25459866   | c.2417C>A             | p.A806E        | 9%  |
|        | <i>UNC5A</i>        | chr5:176305120  | c.1861G>T             | p.A621S        | 7%  |
|        | <i>PTPN2</i>        | chr18:12785826  | c.1229C>A             | p.Thr410Asn    | 6%  |
| LCH-82 | <i>TEK</i>          | chr9:27197448   | c.1760A>G             | p.D587G        | 49% |
|        | <i>CIC</i>          | chr19: 42795793 | c.2782G>A             | p.A928T        | 41% |
|        | <i>BCL11B</i>       | chr14: 99642361 | c.812C>T              | p.P271L        | 47% |
|        | <i>NCOR2</i>        | chr12:124839089 | c.3524G>A             | p.R1175Q       | 67% |
|        | <i>MSH3</i>         | chr5: 79950727  | c.195_203dupGCCCCCAGC | p.P67_P69dup   | 37% |
| LCH-83 | <i>Driver WT</i>    | N/A             | N/A                   | N/A            | N/A |
|        | <i>NSD1</i>         | chr5:176721945  | c.7576C>T             | p.P2526S       | 49% |
|        | <i>TERT</i>         | chr5:1293767    | c.1234C>T             | p.H412Y        | 40% |
|        | <i>ZRSR2</i>        | chrX:15841231   | c.1338_1343delGAGCCG  | p.S447_R448del | 86% |
|        | <i>SAMHD1</i>       | chr20:35526364  | c.1609-2A>G           | p.X537_Splice  | 48% |
| LCH-84 | <i>Driver WT</i>    | N/A             | N/A                   | N/A            | N/A |
| LCH-85 | <i>Driver WT</i>    | N/A             | N/A                   | N/A            | N/A |
| LCH-86 | <i>Driver WT</i>    | N/A             | N/A                   | N/A            | N/A |
| LCH-87 | <i>Driver WT</i>    | N/A             | N/A                   | N/A            | N/A |
|        | <i>APC</i>          | chr5:112175977  | c.4686C>A             | p.D1562E       | 42% |
| LCH-88 | <i>Driver WT</i>    | N/A             | N/A                   | N/A            | N/A |
| LCH-89 | <i>Driver WT</i>    | N/A             | N/A                   | N/A            | N/A |
| LCH-90 | <i>Driver WT</i>    | N/A             | N/A                   | N/A            | N/A |
| LCH-91 | <i>Driver WT</i>    | N/A             | N/A                   | N/A            | N/A |
| LCH-92 | <i>Driver WT</i>    | N/A             | N/A                   | N/A            | N/A |

**Abbreviations:** Langerhans Cell Histiocytosis (LCH); variant allele frequency (VAF); wild type (WT); not applicable (N/A).

Supplementary Table 4: Somatic genetic alterations in juvenile xanthogranuloma (JXG) cohort.

| Study ID | Gene           | Genomic Coordinates | Genomic Variant                  | Amino Acid Change | VAF |
|----------|----------------|---------------------|----------------------------------|-------------------|-----|
| JXG-1    | <i>MAP2K1</i>  | chr15:66729181      | c.389A>G                         | p.Y130C           | N/A |
| JXG-2    | <i>MAP2K1</i>  | chr15:66729162      | c.370C>A                         | p.P124T           | 2%  |
| JXG-3    | <i>MAP2K1</i>  | chr15:66727394      | c.110T>C                         | p.L37P            | N/A |
| JXG-4    | <i>MAP2K1</i>  | chr15:66729150      | c.358G>C                         | p.E120Q           | N/A |
| JXG-5    | <i>MAP2K1</i>  | chr15:66727561      | c.277G>A                         | p.V93I            | 49% |
|          | <i>KIT</i>     | chr4:55593431       | c.1588G>A                        | p.V530I           | 44% |
|          | <i>ARID1B</i>  | chr6:157100396      | c.1333_1334insCGC                | p.A445_P446insP   | 26% |
| JXG-6    | <i>MAP2K1</i>  | chr15:66729181      | c.389A>G                         | p.Y130C           | N/A |
| JXG-7    | <i>CSF1R</i>   | chr5:149441385      | c.1636_1653delTACCAGGTCCGCTGGAAG | p.Y546_K551del    | 64% |
|          | <i>TSC2</i>    | chr16:2134521       | c.4298C>T                        | p.S1433L          | 47% |
|          | <i>TET2</i>    | chr4:106196834      | c.5167C>T                        | p.P1723S          | 49% |
|          | <i>TET2</i>    | chr4:106157698      | c.2599T>C                        | p.Y867H           | 55% |
|          | <i>BRCA2</i>   | chr13:32910458      | c.1966A>G                        | p.T656A           | 52% |
| JXG-8    | <i>CSF1R</i>   | chr5:149441385      | c.1636_1653delTACCAGGTCCGCTGGAAG | p.Y546_K551del    | 27% |
|          | <i>ALK</i>     | chr2:29445273       | c.3452C>T                        | p.T1151M          | 44% |
|          | <i>MSH3</i>    | chr5:80024783       | c.1567G>A                        | p.E523K           | 36% |
|          | <i>AR</i>      | chrX:66765158       | c.170T>A                         | p.L57Q            | 67% |
| JXG-9    | <i>CSF1R</i>   | chr5:149441385      | c.1636_1653delTACCAGGTCCGCTGGAAG | p.Y546_K551del    | 16% |
|          | <i>IKBKE</i>   | chr1:206653437      | c.1321C>T                        | p.R441W           | 43% |
|          | <i>PAX5</i>    | chr9:36882049       | c.964G>A                         | p.A322T           | 46% |
|          | <i>NCOR2</i>   | chr12:124824739     | c.5499_5500insCGGC               | p.S1834Rfs*194    | 9%  |
|          | <i>BRCA2</i>   | chr13:32914592      | c.6100C>T                        | p.R2034C          | 42% |
| JXG-10   | <i>CSF1R</i>   | chr5:149441385      | c.1636_1653delTACCAGGTCCGCTGGAAG | p.Y546_K551del    | 20% |
|          | <i>NF1</i>     | chr17:29422382      | c.55G>T                          | p.E19X            | 19% |
|          | <i>MST1R</i>   | chr3:49940328       | c.717G>A                         | p.P239S           | 5%  |
|          | <i>ZNF185</i>  | chrX:152087569      | c.495CGAG>C                      | p.E165del         | 9%  |
|          | <i>BICRA</i>   | chr19:48197890      | c.2801AC>A                       | p.P937Hfs*10      | 5%  |
|          | <i>MLH3</i>    | chr14:75514603      | c.1755_1756insA                  | p.E586Rfs*3       | 4%  |
| JXG-11   | <i>CSF1R</i>   | chr5:149441385      | c.1636_1653delTACCAGGTCCGCTGGAAG | p.Y546_K551del    | 19% |
|          | <i>NF1</i>     | chr17:29422382      | c.55G>T                          | p.E19X            | 20% |
|          | <i>FGFR2</i>   | chr10:123279669     | c.765G>A                         | p.R255W           | 5%  |
|          | <i>SMARCA2</i> | chr9:2060951        | c.1659G>A                        | p.A553T           | 6%  |
|          | <i>UVRAG</i>   | chr11:75694430      | c.701_703G>GA                    | p.S237Kfs*2       | 9%  |
| JXG-12   | <i>KRAS</i>    | chr12:25398284      | c.35G>A                          | p.G12D            | N/A |
| JXG-13   | <i>KRAS</i>    | chr12:25398284      | c.35G>A                          | p.G12D            | N/A |
| JXG-14   | <i>KRAS</i>    | chr12:25398284      | c.35G>A                          | p.G12D            | N/A |

|        |                      |                |                                              |                  |     |
|--------|----------------------|----------------|----------------------------------------------|------------------|-----|
| JXG-15 | <i>KRAS</i>          | chr12:25398284 | c.35G>C                                      | p.G12A           | 18% |
|        | <i>SPEN</i>          | chr1:16256120  | c.3385G>A                                    | p.V1129I         | 48% |
| JXG-16 | <i>NRAS</i>          | chr1:115258744 | c.38G>A                                      | p.G13D           | N/A |
| JXG-17 | <i>NRAS</i>          | chr1:115258744 | c.38G>A                                      | p.G13D           | N/A |
| JXG-18 | <i>NRAS</i>          | chr1:115258744 | c.38G>A                                      | p.G13D           | N/A |
| JXG-19 | <i>KIT</i>           | chr4:55593431  | c.1588G>A                                    | p.V530I          | 52% |
|        | <i>ROS1</i>          | chr6:117715381 | c.1108T>C                                    | p.S370P          | 51% |
|        | <i>NOTCH4</i>        | chr6:32164153  | c.5245delG                                   | p.A1749Pfs*34    | 50% |
|        | <i>ARID1B</i>        | chr6:157100396 | c.1333_1334insCGC                            | p.A445_P446insP  | 23% |
|        | <i>AR</i>            | chrX:66766356  | c.1369_1380delGGCGGCGGCGGC                   | p.457_460del     | 23% |
| JXG-20 | <i>KIT</i>           | chr4:55593431  | c.1588G>A                                    | p.V530I          | 24% |
| JXG-21 | <i>KIT</i>           | chr4:55575669  | c.1195G>A                                    | p.V399I          | 44% |
|        | <i>DOT1L</i>         | chr19:2222424  | c.3256C>T                                    | p.R1086C         | 51% |
|        | <i>BRCA2</i>         | chr13:32972744 | c.10094_10095insGAATTATATC                   | p.S3366Nfs*5     | 39% |
|        | <i>FLT1</i>          | chr13:28971136 | c.1621G>T                                    | p.V541F          | 49% |
| JXG-22 | <i>JAK3</i>          | chr19:17945696 | c.2164G>A                                    | p.V722I          | 46% |
|        | <i>TSC2</i>          | chr16:2120559  | c.1819G>A                                    | p.A607T          | 49% |
| JXG-23 | <i>JAK3</i>          | chr19:17953950 | c.452C>G                                     | p.P151R          | 48% |
| JXG-24 | <i>ALK</i>           | chr2:29462643  | c.2258G>A                                    | p.R753Q          | 49% |
|        | <i>INSR</i>          | chr19:7125518  | c.3034G>A                                    | p.V1012M         | 50% |
|        | <i>DOT1L</i>         | chr19:2210451  | c.1058C>G                                    | p.A353G          | 53% |
|        | <i>KMT2D</i>         | chr12:49426729 | c.11750_11758delAGCAGCAGC                    | p.Q3917_Q3919del | 34% |
|        | <i>SOX17</i>         | chr8:55372258  | c.949_954delCACACAG                          | p.317_318del     | 32% |
|        | <i>LATS2</i>         | chr13:21557529 | c.2316C>G                                    | p.I772V          | 51% |
| JXG-25 | <i>MET</i>           | chr7:116398608 | c.2198C>T                                    | p.T733I          | 43% |
|        | <i>KMT2D</i>         | chr12:49445189 | c.2250_2276del<br>GCACCTGTCCCCCGGCCTGAGGAGCC | p.R755_P763del   | 36% |
|        | <i>MSH3</i>          | chr5:79950727  | c.182_190delCAGCGCCCC                        | p.P67_P69del     | 34% |
| JXG-26 | <i>CSF3R</i>         | chr1:36933539  | c.1748G>A                                    | p.R583H          | 48% |
|        | <i>CSF3R</i>         | chr1:36933198  | c.1919C>T                                    | p.T640I          | 50% |
|        | <i>FBXW7</i>         | chr4:153244091 | c.2066G>A                                    | p.R689Q          | 2%  |
|        | <i>MAP3K13</i>       | chr3:185198302 | c.2785_2787delGAA                            | p.E929del        | 44% |
|        | <i>TET2</i>          | chr4:106155533 | c.434G>A                                     | p.S145N          | 47% |
|        | <i>MSH3</i>          | chr5:79950724  | c.178_179insCCGCAGCGC                        | p.A60_A61insAAP  | 30% |
| JXG-27 | <i>IRF2BP2-NTRK1</i> | N/A            | N/A                                          | N/A              | N/A |
|        | <i>MAP3K13</i>       | chr3:185146499 | c.130G>A                                     | p.E44K           | 54% |
|        | <i>TET2</i>          | chr4:106157698 | c.2599T>C                                    | p.Y867H          | 45% |
|        | <i>TET2</i>          | chr4:106196834 | c.5167C>T                                    | p.P1723S         | 53% |

|        |                      |                |                            |                 |     |
|--------|----------------------|----------------|----------------------------|-----------------|-----|
| JXG-28 | <i>IRF2BP2-NTRK1</i> | N/A            | N/A                        | N/A             | N/A |
|        | <i>NOTCH2</i>        | chr1:120459251 | c.6094C>A                  | p.H2032N        | 37% |
|        | <i>MSH3</i>          | chr5:79950727  | c.181_182insCAGCGCCCC      | p.A61_A62insAPP | 54% |
| JXG-29 | <i>TPM3-NTRK1</i>    | N/A            | N/A                        | N/A             | N/A |
|        | <i>NOTCH4</i>        | chr6:32165201  | c.4927C>T                  | p.R1643X        | 44% |
|        | <i>PTPRD</i>         | chr9:8486142   | c.2675T>C                  | p.V892A         | 46% |
|        | <i>FAT1</i>          | chr4:187538942 | c.8798A>T                  | p.Q2933L        | 39% |
| JXG-30 | <i>SQSTM1-NTRK1</i>  | N/A            | N/A                        | N/A             | N/A |
|        | <i>FLT1</i>          | chr13:28919682 | c.2255C>T                  | p.S752L         | 39% |
| JXG-31 | <i>TPM3-NTRK1</i>    | N/A            | N/A                        | N/A             | N/A |
| JXG-32 | <i>IRF2BP2-NTRK1</i> | N/A            | N/A                        | N/A             | N/A |
|        | <i>AR</i>            | chrX:66766356  | c.1369_1380delGGCGGCGGCGGC | p.457_460del    | 34% |
| JXG-33 | <i>RNF11-BRAF</i>    | N/A            | N/A                        | N/A             | N/A |
|        | <i>KMT2C</i>         | chr7:151945330 | c.2189C>A                  | p.S730Y         | 11% |
|        | <i>DDX11</i>         | chr12:31244665 | c.1102C>T                  | p.P368S         | 8%  |
|        | <i>MED12</i>         | chrX:70361098  | c.6286_6288del             | p.Q2096del      | 12% |
|        | <i>MUC4</i>          | chr3:195507020 | c.11431G>C                 | p.V3811L        | 10% |
| JXG-34 | <i>MS4A6A-BRAF</i>   | N/A            | N/A                        | N/A             | N/A |
| JXG-35 | <i>BICD2-BRAF</i>    | N/A            | N/A                        | N/A             | N/A |
| JXG-36 | <i>BICD2-BRAF</i>    | N/A            | N/A                        | N/A             | N/A |
| JXG-37 | <i>NCOA4-RET</i>     | N/A            | N/A                        | N/A             | N/A |
| JXG-38 | <i>NCOA4-RET</i>     | N/A            | N/A                        | N/A             | N/A |
| JXG-39 | <i>KIF5B-ALK</i>     | N/A            | N/A                        | N/A             | N/A |
| JXG-40 | Driver WT            | N/A            | N/A                        | N/A             | N/A |
|        | <i>FGF4</i>          | chr11:69588217 | c.481C>G                   | p.L161F         | 45% |
|        | <i>MAP3K13</i>       | chr3:185146499 | c.130G>A                   | p.E44K          | 48% |
|        | <i>INSR</i>          | chr19:7117151  | c.4065C>G                  | p.Y1355X        | 43% |
|        | <i>LATS2</i>         | chr13:21557531 | c.2314A>G                  | p.I772V         | 49% |
|        | <i>FAT1</i>          | chr4:187538942 | c.8798A>T                  | p.Q2933L        | 45% |

|        |                |                 |                                        |                  |     |
|--------|----------------|-----------------|----------------------------------------|------------------|-----|
| JXG-41 | Driver WT      | N/A             | N/A                                    | N/A              | N/A |
| JXG-42 | Driver WT      | N/A             | N/A                                    | N/A              | N/A |
|        | <i>PTPRD</i>   | chr9:8486142    | c.2675T>C                              | p.V892A          | 35% |
| JXG-43 | Driver WT      | N/A             | N/A                                    | N/A              | N/A |
|        | <i>ARID1B</i>  | chr6:157527492  | c.5218_5220delGAC                      | p.D1741del       | 46% |
| JXG-44 | Driver WT      | N/A             | N/A                                    | N/A              | N/A |
|        | <i>FLT3</i>    | chr13:28599077  | c.2211G>C                              | p.M737I          | 45% |
|        | <i>ARID1B</i>  | chr6:157099981  | c.919_924delGGCGGC                     | p.307_308del     | 32% |
|        | <i>SPEN</i>    | chr1:16259837   | c.7102G>A                              | p.A2368T         | 44% |
| JXG-45 | Driver WT      | N/A             | N/A                                    | N/A              | N/A |
|        | <i>FGF6</i>    | chr12:4554549   | c.188C>T                               | p.A63V           | 38% |
|        | <i>KLF4</i>    | chr9:110249963  | c.712C>T                               | p.P238S          | 41% |
|        | <i>BCL6</i>    | chr3:187447543  | c.650G>A                               | p.R217Q          | 37% |
|        | <i>ERCC5</i>   | chr13:103518178 | c.2116G>C                              | p.E706Q          | 40% |
| JXG-46 | Driver WT      | N/A             | N/A                                    | N/A              | N/A |
|        | <i>CBL</i>     | chr11:119148991 | c.1211G>T                              | p.C404F          | 71% |
|        | <i>CHEK2</i>   | chr22:29121087  | c.470T>C                               | p.I157T          | 48% |
| JXG-47 | Driver WT      | N/A             | N/A                                    | N/A              | N/A |
|        | <i>SOX17</i>   | chr8:55372258   | c.948_949insCACCAG                     | p.Q316_H317insHQ | 59% |
| JXG-48 | Driver WT      | N/A             | N/A                                    | N/A              | N/A |
| JXG-49 | Driver WT      | N/A             | N/A                                    | N/A              | N/A |
| JXG-50 | Driver WT      | N/A             | N/A                                    | N/A              | N/A |
| JXG-51 | Driver WT      | N/A             | N/A                                    | N/A              | N/A |
| JXG-52 | Driver WT      | N/A             | N/A                                    | N/A              | N/A |
| JXG-53 | Driver WT      | N/A             | N/A                                    | N/A              | N/A |
|        | <i>INSR</i>    | chr19:7125518   | c.3034G>A                              | p.V1012M         | 42% |
|        | <i>NCOR2</i>   | chr12:124832415 | c.4028A>G                              | p.H1343R         | 18% |
|        | <i>SMARCA4</i> | chr19:11169011  | c.4505G>A                              | p.R1502H         | 46% |
| JXG-54 | Driver WT      | N/A             | N/A                                    | N/A              | N/A |
| JXG-55 | Driver WT      | N/A             | N/A                                    | N/A              | N/A |
|        | <i>EP300</i>   | chr22:41574017  | c.6303_6323del<br>TGGGCAGCCTGGCATGCCCA | p.2101_2108del   | 36% |
|        | <i>MSH3</i>    | chr5:79950727   | c.181_182insCAGCGCCCC                  | p.A61_A62insAPP  | 30% |

**Abbreviations:** Juvenile Xanthogranuloma (JXG); variant allele frequency (VAF); wild type (WT); not applicable (N/A)



Supplementary Table 5: Somatic mutations in the Rosai-Dorfman Disease (RDD) cohort.

| Study ID | Gene             | Genomic Coordinates | Genomic Variant                        | Amino Acid Change   | VAF |
|----------|------------------|---------------------|----------------------------------------|---------------------|-----|
| RDD-1    | <i>KRAS</i>      | chr12:25398284      | c.35G>A                                | p.G12D              | N/A |
| RDD-2    | <i>KRAS</i>      | chr12:25398284      | c.35G>A                                | p.G12D              | N/A |
| RDD-3    | <i>KRAS</i>      | chr12:25378647      | c.351A>C                               | p.K117N             | 2%  |
| RDD-4    | <i>KRAS</i>      | chr12:25378647      | c.351A>C                               | p.K117N             | 8%  |
| RDD-5    | <i>MAP2K1</i>    | chr15:66729163      | c.371C>G                               | p.P124R             | N/A |
| RDD-6    | <i>MAP2K1</i>    | chr15:66774131      | c.607G>A                               | p.E203K             | 4%  |
|          | <i>SNX24</i>     | chr5:122343374      | c.443-3C>T                             | N/A                 | 11% |
|          | <i>CIC</i>       | chr19:42799295      | c.7507dupC                             | p.Q2502fs           | 12% |
|          | <i>INT32</i>     | chr17:59999198      | c.457-10->T                            | N/A                 | 12% |
|          | <i>SFR1</i>      | chr10:105885262     | c.547-9C>T                             | N/A                 | 10% |
|          | <i>MUC4</i>      | chr3:195510535      | c.7916C>G                              | p.T2639S            | 6%  |
|          | <i>PDS5A</i>     | chr4:39924373       | c.528-5T>-                             | N/A                 | 21% |
|          | <i>USP35</i>     | chr11:77911287      | c.1038+7-<br>>CCCCTGCCTGCTGCCCTGGTGAGG | N/A                 | 23% |
| RDD-7    | <i>NRAS</i>      | chr1:115258744      | c.38G>A                                | p.G13D              | N/A |
| RDD-8    | <i>ARAF</i>      | chrX:47426131       | c.651C>A                               | p.N217K             | N/A |
| RDD-9    | <i>CSF1R</i>     | chr5:149433745      | c.2806G>A                              | p.G936S             | 6%  |
| RDD-10   | <i>Driver WT</i> | N/A                 | N/A                                    | N/A                 | N/A |
|          | <i>BRD4</i>      | chr19:15350270      | c.3509C>G                              | p.P1170R            | 40% |
|          | <i>PHOX2B</i>    | chr4:41750401       | c.227G>C                               | p.S76T              | 35% |
|          | <i>ERCC2</i>     | chr19:45867247      | c.946C>G                               | p.Q316E             | 52% |
|          | <i>BRCA1</i>     | chr17:41251803      | c.536A>G                               | p.Y179C             | 48% |
|          | <i>BRCA1</i>     | chr17:41246092      | c.1456T>C                              | p.F486L             | 48% |
|          | <i>BRCA1</i>     | chr17:41245900      | c.1648A>C                              | p.N550H             | 45% |
|          | <i>LATS2</i>     | chr13:21563171      | c.747_748delinsTT                      | p.Q249_G250delinsHC | 51% |
|          | <i>ATM</i>       | chr11:108139269     | c.2771G>A                              | p.R924Q             | 44% |
|          | <i>RPS6KB2</i>   | chr11:67202161      | c.1264G>A                              | p.V422I             | 52% |
| RDD-11   | <i>Driver WT</i> | N/A                 | N/A                                    | N/A                 | N/A |
| RDD-12   | <i>Driver WT</i> | N/A                 | N/A                                    | N/A                 | N/A |
| RDD-13   | <i>Driver WT</i> | N/A                 | N/A                                    | N/A                 | N/A |
| RDD-14   | <i>Driver WT</i> | N/A                 | N/A                                    | N/A                 | N/A |
| RDD-15   | <i>Driver WT</i> | N/A                 | N/A                                    | N/A                 | N/A |
| RDD-16   | <i>Driver WT</i> | N/A                 | N/A                                    | N/A                 | N/A |

|        |                  |     |     |     |     |
|--------|------------------|-----|-----|-----|-----|
| RDD-17 | <i>Driver WT</i> | N/A | N/A | N/A | N/A |
|--------|------------------|-----|-----|-----|-----|

**Abbreviations:** Rosai-Dorfman Disease (RDD); variant allele frequency (VAF); wild type (WT); not applicable (N/A)

Supplementary Table 6: Somatic genetic alterations in the histiocytic sarcoma cohort.

| Study ID      | Gene             | Genomic Coordinates | Genomic Variant             | Amino Acid Change   | VAF |
|---------------|------------------|---------------------|-----------------------------|---------------------|-----|
| HS-1          | <i>MAP2K1</i>    | chr15:66727443      | c.157T>C                    | p.F53L              | 13% |
|               | <i>KRAS</i>      | chr12:25378647      | c.351A>T                    | p.K117N             | 16% |
|               | <i>RSU1</i>      | chr10:16824091      | c.110-8C>T                  | N/A                 | 13% |
|               | <i>GAB2</i>      | chr11:77937662      | c.1055dupC                  | p.P352fs            | 26% |
|               | <i>TNFRSF14</i>  | chr1:2493110        | c.552-2A>C                  | N/A                 | 37% |
|               | <i>ACIN1</i>     | chr14:23530733      | c.3371dupC                  | p.P1124fs           | 14% |
|               | <i>PHF6</i>      | chrX:133559269      | c.1007_1008del              | p.D336fs            | 36% |
|               | <i>SCA1</i>      | chr9:127765856      | c.862-7->T                  | N/A                 | 18% |
|               | <i>ARID4B</i>    | chr1:235419047      | c.G202A                     | p.V68M              | 10% |
|               | <i>PTF1A</i>     | chr10:23481515      | c.C56A                      | p.S19X              | 15% |
|               | <i>FOXP1</i>     | chr14:29236691      | c.C206A                     | p.P69Q              | 8%  |
|               | <i>ZFP36L1</i>   | chr14:69259610      | c.G253C                     | p.V85L              | 21% |
|               | <i>CREBBP</i>    | chr16:3795336       | c.T3856C                    | p.C1286R            | 19% |
|               | <i>SMARCA4</i>   | chr19:11141427      | c.G3404A                    | p.R1135Q            | 16% |
|               | <i>CRTC1</i>     | chr19:18888001      | c.A1762C                    | p.S588R             | 16% |
|               | <i>RPRD1B</i>    | chr20:36718165      | c.G869T                     | p.R290L             | 17% |
|               | <i>MITF</i>      | chr3:69928336       | c.T108A                     | p.S36R              | 15% |
|               | <i>POU3F2</i>    | chr6:99283408       | c.A659G                     | p.D220G             | 15% |
|               | <i>POU4F2</i>    | chr4:147561458      | c.C728T                     | p.S243L             | 15% |
|               | <i>PHOX2B</i>    | chr4:41747943       | c.G826A                     | p.G276S             | 12% |
|               | <i>TLX3</i>      | chr5:170737240      | c.C508T                     | p.R170C             | 15% |
|               | <i>HIST1H1E</i>  | chr6:26156862       | c.C244A                     | p.L82M              | 15% |
|               | <i>HIST1H2AK</i> | chr6:27805944       | c.C174A                     | p.Y58X              | 13% |
|               | <i>ZNF479</i>    | chr7:57188200       | c.G922T                     | p.V308L             | 5%  |
|               | <i>MSH5</i>      | chr6:31727624       | c.A1557C                    | p.L519F             | 18% |
|               | <i>PAXX</i>      | chr9:139886994      | c.C99G                      | p.D33E              | 15% |
| <i>KPNA5</i>  | chr6:117023177   | c.436-5C>T          | N/A                         | 12%                 |     |
| <i>KIF20B</i> | chr10:91497374   | c.A2656C            | p.N886H                     | 23%                 |     |
| <i>ATG12</i>  | chr5:115167564   | c.364-4G>T          | N/A                         | 11%                 |     |
| HS-2          | <i>MAP2K1</i>    | chr15:66727443      | c.159T>A                    | p.F53L              | 7%  |
|               | <i>KIT</i>       | chr4:55602952       | c.2662C>T                   | p.R888W             | 9%  |
|               | <i>BCL2</i>      | chr18:60985344      | c.556C>G                    | p.H186D             | 8%  |
|               | <i>BCL2</i>      | chr18:60985530      | c.367_370delinsGCCG         | p.P123_F124delinsAV | 8%  |
|               | <i>BCL2</i>      | chr18:60985629      | c.271C>T                    | p.P91S              | 11% |
|               | <i>BCL2</i>      | chr18:60985715      | c.185C>T                    | p.S62F              | 11% |
|               | <i>BCL10</i>     | chr1:85733589       | c.421_422delAG              | p.S141fs            | 9%  |
|               | <i>CDKN1B</i>    | chr12:12871001      | c.228G>A                    | p.W76*              | 9%  |
|               | <i>CDKN1B</i>    | chr12:12871012      | c.239_242delinsTGAG         | p.E80_K81delinsVR   | 8%  |
| HS-3          | <i>BRAF</i>      | chr7:140453136      | c.1799A>T                   | p.V600E             | 46% |
| HS-4          | <i>KRAS</i>      | chr12:25398281      | c.38G>A                     | p.G13D              | 32% |
| HS-5          | <i>CSF1R</i>     | chr5:149441348      | c.1682_1690delATACTTT<br>CA | p.Y561_I564delinsF  | 24% |
|               | <i>PTPN11</i>    | chr12:112888210     | c.226G>A                    | p.E76K              | 31% |
|               | <i>MED12</i>     | chrX:70349666       | c.3828_3854delinsGGTC       | p.D1276Efs*15       | 22% |
|               | <i>SETD2</i>     | chr3:47144879       | c.4874G>A                   | p.R1625H            | 16% |

|             |                   |                      |                   |                     |            |
|-------------|-------------------|----------------------|-------------------|---------------------|------------|
|             | <b>SETD2</b>      | <b>chr3:47058736</b> | <b>c.7541dupA</b> | <b>p.H2514Qfs*6</b> | <b>33%</b> |
| <b>HS-6</b> | <b>CLIP2-BRAF</b> | <b>N/A</b>           | <b>N/A</b>        | <b>N/A</b>          | <b>N/A</b> |

**Abbreviations:** Histiocytic Sarcoma (HS); variant allele frequency (VAF); not applicable (N/A)
